# Supplementary material for: RAL GTPases mediate EGFR-driven intestinal stem cell proliferation and tumourigenesis
Source: eLife. 2021 Jun 7;10:e63807. doi: 10.7554/eLife.63807 (PMC8216719; doi:10.7554/eLife.63807)
Supplement: Figure 1—figure supplement 1—source data 1. [file elife-63807-fig1-figsupp1-data1.xlsx]

## Sheet: B
Mock				Ecc15
+	RalA-RNAi(2)			+	RalA-RNAi(2)
1.02194	1.33208			1.48497	1.56266
0.916818	1.27036			1.88055	1.36498
1.03215	1.12171			1.86258	1.55847
0.933612	1.13247			2.17179	1.58921
1.05309	1.39157			1.76037	1.37656
0.983886	0.886899			1.62102	1.59329
1.05849	1.10488			1.78948	1.73895
	1.17302			1.88451	1.27177
				1.79405
				1.62764

## Sheet: D
Mock				Ecc15
+	RalA-RNAi(2)			+	RalA-RNAi(2)
0.983755	2.06435			3.96569	1.4929
1.47486	1.35421			2.27757	1.85356
0.931069	0.808607			3.17946	2.34057
0.818015	1.18955			2.92067	1.95909
0.92136	1.0577			3.329	2.21741
0.870946				3.86989	1.189
				2.63352
				2.6583

## Sheet: E
WT
	mouse 1	100	96	100	96	100	92	97	85	82	100	100	96
	mouse 2	97	100	100	94	93	92	100	100	89	100	100	97	100
	mouse 3	100	86	94	100	86	100	100	100	90	100	100	88
		RalaKO
	mouse 1	93	96	100	100	100	100	100	100	100	90	91	93	100	100
	mouse 2	93	100	80	100	100	100	95	100	100	93	83	100	100	100	94	100	95	82	87	100	100	94	100
	mouse 3	100	100	94	95	93	100	82	100	100	100	100	95
		RalbKO
	mouse 1	77	80	94	93	100	100	100	100	92	73	100	100	100
	mouse 2	100	92	100	100	92	100	100	100	72	100	100	91	100	100	80	88	91	100	93	100
	mouse 3	84	90	95	100	97	100	96	100	82	91	76	90	100
	mouse 4	100	100	96	100	96	94	100	100	84	100	93	100	96	100	100	95	97	100	98	100	83	100	90

## Sheet: G
+		RalAwt(1)
0.858065		0.946706
0.810789		0.772701
1.23754		1.35504
0.970929		0.897097
0.86837		1.07322
1.13292		0.780168
1.12139		0.908817
0.637977		1.20066
1.13513		0.729973
0.925504		1.08141
1.41317		1.01317
0.866761		1.04069
0.822255		0.778777
1.14946		1.14408
1.04974		1.17737
		1.01824
		1.25998
		1.11316

## Sheet: J
Mock		Ecc15
0.959496		1.03705
0.836696		0.874844
0.987424		0.92815
0.759713		1.14581
1.08838		1.16835
1.12804		0.814325
1.14176		1.11912
1.09849		1.13767
		1.29417
		1.37564
		1.41618
		1.08735
		1.21132
		0.920946
		0.702937
		1.00005
		0.790665
		0.787383
		0.95725
		0.998138
		0.797894
		0.967233
		0.855036
