# Supplementary material for: RAL GTPases mediate EGFR-driven intestinal stem cell proliferation and tumourigenesis
Source: eLife. 2021 Jun 7;10:e63807. doi: 10.7554/eLife.63807 (PMC8216719; doi:10.7554/eLife.63807)
Supplement: Figure 1—source data 1. [file elife-63807-fig1-data1.xlsx]

## Sheet: B
Control		wg-RNAi		EGFR-RNAi		wg-RNAi + EGFR-RNAi		RalA-RNAi(1)
1		3		3		5		4
1		2		3		5		3
1		3		3		5		5
1		3		4		5		4
1		3		3		4		4
1		2		3		5		4
1		2		3		3		4
1		3		3		5		4
1		2		3		5		4
1		2		3		5		3
1		3		3		4		5
1		3		3				4
1		3		2				5
1		3		3				4
1		2		3				5
1		3		4				5
1		3		3				4
1		2		2				4
1		2		3				4
1		2		3				4
1		2						3
1		2						4
1		3						3
1		2						3
1								3
1								3
1								4
1								5
1								4
1								5
1								5
1								3
1								4
1								5
1
1
1
1
1
1
1
1
1
1
1

## Sheet: D
rho								rho
	Mock								Ecc15
+	0.582687	0.2693	0.139944	0.235484				+	1.79225	2.79332	2.68194	2.52163
RalA-RNAi (1)	0.346995	0.249247	0.350482	0.271729				RalA-RNAi (1)	1.53913	1.66442	1.70028	0.67852
stg								stg
	Mock								Ecc15
+	0.349767	0.421835	0.201835	0.249896				+	2.24627	2.20348	1.83492	1.79171
RalA-RNAi (1)	0.310266	0.336435	0.363314	0.305041				RalA-RNAi (1)	1.56023	0.987481	1.32047	1.36533
Sox21a								Sox21a
	Mock								Ecc15
+	0.511371	0.493385	0.29988	0.379742				+	2.80383	2.91968	2.73827	2.76074
RalA-IR(1)	0.378552	0.406363	0.454836	0.396968				RalA-IR(1)	1.5736	1.49858	1.37999	0.897895

## Sheet: F
	Mock
+	1.22619	1.10554	1.00246	0.950229	0.960163	0.911286	0.844127
RalA-IR(1)	1.13793	0.997346	0.918763	0.990655	0.978177	0.97866
	Ecc15
+	1.97595	1.87871	1.57205	2.34741	2.25998	1.37088	1.9293	1.74656
RalA-IR(1)	1.0043	1.00841	0.751158	2.19827	0.937741	0.739447	0.602304	0.775412

## Sheet: H
Mock					Ecc15
+	RalA-RNAi (1)				+	RalA-RNAi (1)
0.758919	0.559425				1.45267	1.00665
1.83206	0.644459				2.62574	0.965235
1.37755	0.681243				2.38762	1.00288
0.766923	1.1561				1.91882	0.800936
0.57148	0.805653				2.27351	1.08265
0.693064	0.755956				1.573	1.42562
1.10688	0.856251				1.35164	1.06323
0.955834	1.73216				1.62799	1.34611
1.02981	1.09021				1.75789	1.28303
1.19376	1.16276				2.33604	0.923599
0.71371					1.46868	1.3091
					1.67106	0.807544
					2.18964

## Sheet: J
	WT
mouse 1	73	100	82	86	86	83	94	83	94	83	75	100	84	90	91	77	86	96	83	100	100	100	87
mouse 2	100	100	100	100	100	100	100	87	71	100	100	100	100	100	80	80
mouse 3	100	100	100	100	88	80	50	100	74	100	100	100	100	100	100	100	100	100	100	100	100	100	100	100	100	67
	RalaKO
mouse 1		29	23	60	39	69	55	83	63	50	100	100	43	43	46	36
mouse 2		28	87	75	50	29	83	50	50	50	63
mouse 3		31	15	38	25	40	50	22	50	65	75	100	48	29	29
RalbKO
mouse 1	46	68	100	100	48	70	50	80	100	42	32	100	20	69	88	40
mouse 2	55	43	74	31	71	67	78	47	35	71	82	67	50
mouse 3	21	56	63	67	17	67	60	100	100	87	74
mouse 4	60	66	100	56	75	80	67	57	71	71	75	29	38	100	100	27

## Sheet: L
+		RalAwt(1)
1.18161		1.2279
1.31357		1.4714
0.795196		1.9078
1.01694		1.54779
1.11133		1.35211
0.822322		1.04424
1.01851		1.43462
0.740527		0.869362
1.06469		0.927538
0.990161		2.38422
1.08054		1.10539
1.14477		1.0561
0.918169		1.23815
0.924158		1.12916
0.920237		1.71495
0.957271		2.61402
		1.06736
		1.00566
		1.25543

## Sheet: N
+		RalAwt(1)
1.28212		4.80132
1.21346		2.25867
0.736562		0.712373
1.11395		1.17154
0.674056		1.57235
1.31592		1.91287
0.663931		2.26688
1.41664		1.58577
1.45758		3.75418
1.21423		5.7685
1.02415		1.41116
0.89494		5.59358
0.848776		2.13797
0.638876		4.70537
0.656304		4.05194
0.853687		3.1739
0.994817
