# Supplementary material for: RAL GTPases mediate EGFR-driven intestinal stem cell proliferation and tumourigenesis
Source: eLife. 2021 Jun 7;10:e63807. doi: 10.7554/eLife.63807 (PMC8216719; doi:10.7554/eLife.63807)
Supplement: Figure 2—source data 1. [file elife-63807-fig2-data1.xlsx]

## Sheet: B
Mock				Ecc15
+	GEFmeso-IR			+	GEFmeso-IR
4	7			49	80
3	16			84	60
3	26			129	46
2	21			66	51
3	14			135	61
5	4			94	56
1	21			63	58
7	5			87	67
0					48
0					46
					74
					54

## Sheet: C
Mock				Ecc15
+	RalGPS-IRGD			+	RalGPS-IRGD
4	17			93	31
3	3			78	13
1	1			36	17
4	0			70	28
1	0			53	20
1	4			53	31
1	2			78	56
0	1			65	17
1	0			25	15
0	0			54	74
4	13			45	24
0	0			64	33
5	0			29	23
2	1			48	50
5	7			38	23
1	0			41	17
4	12			56	14
0	0			25	64
1	5			58	62
5	3			82	81
0				66	72
3				57	33
1				57	80
3				78	30
0				66	36
0				69	20
0				103	33
13				89	42
2				75	27
				64	42
				92	75
		97	40
			28

## Sheet: D
Mock				Ecc15
+	Rgl-IR			+	Rgl-IR
4	2			82	65
3	0			66	51
1	0			57	24
4	0			57	42
1	2			78	54
1	4			66	46
1	0			69	20
0	1			103	17
1	5			89	46
0	9			75	12
	0			64	54
	14			92	63
				97	47

## Sheet: F
Mock								Ecc15
+	GEFmeso-RNAi	RalGPS-RNAi	Rgl-RNAi					+	GEFmeso-RNAi	RalGPS-RNAi	Rgl-RNAi
1.14296	1.22686	0.865702	1.17753					1.89156	3.18447	0.907488	1.43874
1.25167	1.2975	0.920299	0.917127					1.52489	1.62687	0.744298	1.01775
0.941315	0.780689	1.06269	1.0196					1.99388	1.28682	1.48794	1.02392
1.055	0.997246	0.827377	1.37971					1.25618	2.32734	1.03659	1.16068
1.13835	1.01743	1.05605	0.998453					1.94392	1.12446	1.15928	1.11783
0.71085	1.0551	1.20118	1.06543					1.61589	1.5687	1.54608	1.22528
0.880896	1.63427	0.959358	1.1824					2.08043	1.08556	1.22104	1.1656
1.12597	1.79582		1.12575					1.64197	1.86225		1.3434
0.752983	1.32934		1.37175					1.98239	1.87686
1.49346	1.83347		0.979554					1.77416	1.52946
0.906609								3.15674	1.27288
0.770319								1.77062	1.55179
0.965237								1.39915	2.01451
1.11807								4.06054	3.76023
0.89891								2.91158
0.847402								2.32147
1.108								2.72384
0.975739								3.36851
0.778701								1.54533
1.10435								3.596
1.03321								2.01193
								3.86382
								5.29488
								3.89833
								5.35655
								3.84794
