# Supplementary material for: RAL GTPases mediate EGFR-driven intestinal stem cell proliferation and tumourigenesis
Source: eLife. 2021 Jun 7;10:e63807. doi: 10.7554/eLife.63807 (PMC8216719; doi:10.7554/eLife.63807)
Supplement: Figure 3—figure supplement 1—source data 1. [file elife-63807-fig3-figsupp1-data1.xlsx]

## Sheet: A
	Control	EGFRwt
Control	100	19.625
RalA-IR	101.594	70.4921
Raw data
	No balancer	Balancer	Balancer/no balancer	Relative survival	Multiplier to account for Mendelian genetics in the cross (ie the presence of balancer in both parental lines and not just one)	Relative survival corrected for genetics
w1118	96	61	0.611465	1	1	1
RalA-IR	41	58	0.414141	0.677294	1.5	1.01594
EGFRwt	9	66	0.12	0.19625	1	0.19625
RalA-IR; EGFRwt	25	62	0.287356	0.469947	1.5	0.704921

## Sheet: D
Control		RalA-RNAi (2)
14		12
9		10
33		5
13		5
10		15
11		14
21		11
12		18
8		9
14		29
13		13
29		4
20		9
11
13
7

## Sheet: F
Control		RalA-RNAi(1)
0.728664		0.637665
1.00032		1.20697
0.832284		0.814887
0.58915		0.806398
1.04054		1.41825
1.20872		0.841117
0.804177		1.1302
1.11708		1.27183
0.909342		1.04015
1.33525		1.34164
1.07459		1.23222
0.976764		1.11388
0.872295		1.05479
1.04161		0.903062
1.35456		0.955636
1.11465		0.860315
1.04633		1.09342
1.01293		1.03551
1.05555		1.01518
1.3026		1.22739
1.01837		1.09362
0.874202		0.933484
0.782862		0.864108
0.930036
0.960037
1.01709
