# Supplementary material for: RAL GTPases mediate EGFR-driven intestinal stem cell proliferation and tumourigenesis
Source: eLife. 2021 Jun 7;10:e63807. doi: 10.7554/eLife.63807 (PMC8216719; doi:10.7554/eLife.63807)
Supplement: Figure 3—source data 1. [file elife-63807-fig3-data1.xlsx]

## Sheet: B
Control				EGFRwt				RasV12
+	RalA-RNAi (1)			+	RalA-RNAi (1)			+	RalA-RNAi (1)
0	3			10	0			31	46
1	0			33	1			56	37
0	5			16	1			32	26
0	6			18	23			34	42
6	3			9	7			22	27
1	0			10	3			33	68
1	5			0	1			31	35
2	3			11	9			48	33
0	0			13	3			26	46
2	4			25	2			50	33
6	7			15	0			38	28
5	4			12	3			34	35
0				10	13			31	30
2				20	0			35	28
				16	1			33	25
				1	9			22	47
				22	6			29	45
				16	6			62	26
				17	1			8	61
				33	12			48	27
				13	15			37	32
				13	8			12	33
				26	3			31

## Sheet: D
Control					EGFRwt				RasV12
+					+	RalA-RNAi			+	RalA-RNAi
1.19434					1.22332	0.927806			8.46524	6.00083
1.04063					1.3631	0.961639			5.62019	3.164
0.979398					1.22786	1.0871			8.89341	3.75958
0.852527					1.74702	1.12302			7.1317	4.73068
0.933105					1.3641	0.947733			8.06212	5.59768
0.945607					1.4724	0.935053			7.82227	4.92995
0.92961					2.44996	1.05092			6.00346	3.8359
0.954581					2.07568	0.914231			3.07235	4.94128
1.07776					2.36017	1.19512			3.08883	6.39373
1.09244					1.52749				2.73267	4.3618
0.919037					2.33761				3.48597	5.02325
0.857728									3.17781	3.85489
1.17777									3.55861	3.3849
0.945134									3.51492	3.97881
0.920873									3.53941	4.82788
1.17945									8.74873	4.90057
1.8728									9.43681	4.60938
0.81745									7.33725	4.27047
0.73511									4.61079	5.0093
0.57464									6.82429	4.20662
									5.92342	3.848
									4.32959
									5.49144

## Sheet: F
Control	EGFRλtop	EGFRλtop,RalA-RNAi	EGFRA887T	EGFRA887T,RalA-RNAi
13	16	11	37	11
2	31	15	76	16
1	30	9	63	20
0	13	14	54	24
0	47	5	45	31
0	34	25	41	14
0	8	13	28	26
0	25	14	47	16
1	19	10	47	22
1	24	10	46	31
4	13	14	35	30
2	30	26
2	25	9
0	19	30
0	17	34
0	20	51
2	11	5
8	64	46
0	47	20
5	44	37
1	65	6
0	21	13
1	63	22
0	42	12
	19	39
	8
	43
	58

## Sheet: H
Control		EGFRλtop		EGFRλtop,RalA-RNAi		EGFRA887T		EGFRA887T,RalA-RNAi
1.24326		1.10854		0.645436		2.27781		1.96483
1.05068		1.71826		1.07799		1.24436		1.03369
0.592459		1.60914		0.50717		2.25267		1.58945
0.509164		1.63203		0.850921		2.51329		1.03699
0.840024		1.8709		0.736988		3.10871		1.90277
1.17626		1.05144		0.814141		0.855578		0.816203
0.998209		2.50466		0.73914		1.00023		3.19087
0.677801		0.863847		1.67694		3.02934		0.615089
1.07711		0.642037		1.25199		1.20065		0.851133
1.6775		1.45366		1.40649		1.79193		1.23394
1.45853		1.29599		1.08526		1.29963		1.47091
0.698999		0.562652		0.720169		1.0969		0.504903
1.04563		2.10503		0.66731		1.20961		1.41702
0.954367		0.646062		2.00439		3.37871		1.21243
		3.32608		0.650529		0.929353
		3.15927		0.97347		1.06921
		1.24007				3.18569
						2.51385
						3.39305
						2.38258
						2.63263
