# Supplementary material for: RAL GTPases mediate EGFR-driven intestinal stem cell proliferation and tumourigenesis
Source: eLife. 2021 Jun 7;10:e63807. doi: 10.7554/eLife.63807 (PMC8216719; doi:10.7554/eLife.63807)
Supplement: Figure 4—figure supplement 2—source data 1. [file elife-63807-fig4-figsupp2-data1.xlsx]

## Sheet: B
	EGFRwt
Control		Ras-RNAi
0.804519		0.943828
0.802554		0.689128
0.703224		0.867868
0.76324		0.938045
0.718456		0.897124
0.660799		0.758922
0.757253		0.674527
0.83097		1.00126
0.731414		0.83449
0.67841		0.803357
0.730352		0.678603
0.761278		0.636124
0.744353		0.677687
0.772005		0.652479
0.630616		0.891124
0.635758		0.887083
0.725289		0.799122
0.512085		0.813738
0.835245		0.959377
0.808164
0.665037
0.799033
0.735531
0.592131
0.672539
