# Supplementary material for: RAL GTPases mediate EGFR-driven intestinal stem cell proliferation and tumourigenesis
Source: eLife. 2021 Jun 7;10:e63807. doi: 10.7554/eLife.63807 (PMC8216719; doi:10.7554/eLife.63807)
Supplement: Figure 4—figure supplement 3—source data 1. [file elife-63807-fig4-figsupp3-data1.xlsx]

## Sheet: A
Control		siRal+B
1		0.1
1		0.12

## Sheet: B
Control		siRala+b
1		0.4
1		0.37

## Sheet: C
H1299; siNT versus siRala+Ralb; +/-HGF
cMET
siNT -HGF
1.418	1.391	0.05	0.049	0.153	0.177	0.275	0.272	0.345	0.33
1.478	1.424	0.048	0.044	0.152	0.173	0.246	0.244	0.334	0.339
siNT + HGF
1.418	1.391	0.05	0.049	0.43	0.44	0.714	0.721	0.858	0.755
1.478	1.424	0.048	0.044	0.448	0.442	0.731	0.708	0.801	0.755
siRalA+RalB -HGF
1.345	1.361	0.04	0.039	0.165	0.167	0.285	0.29	0.353	0.348
1.371	1.322	0.039	0.039	0.165	0.167	0.277	0.288	0.348	0.374
siRalA+RalB +HGF
1.345	1.361	0.04	0.039	0.439	0.463	0.678	0.754	0.743	0.757
1.371	1.322	0.039	0.039	0.433	0.464	0.682	0.692	0.75	0.817
siNT -HGF
-BLANK	BLANK haVb3=	0.04775
1.37025	1.34325	0.00225	0.00125	0.10525	0.12925	0.22725	0.22425	0.29725	0.28225
1.43025	1.37625	0.00025	-0.00375	0.10425	0.12525	0.19825	0.19625	0.28625	0.29125
siNT + HGF
-BLANK	BLANK haVb3=	0.04775
1.37025	1.34325	0.00225	0.00125	0.38225	0.39225	0.66625	0.67325	0.81025	0.70725
1.43025	1.37625	0.00025	-0.00375	0.40025	0.39425	0.68325	0.66025	0.75325	0.70725
siRalA+RalB -HGF
-BLANK	BLANK haVb3=	0.03925
1.30575	1.32175	0.00075	-0.00025	0.12575	0.12775	0.24575	0.25075	0.31375	0.30875
1.33175	1.28275	-0.00025	-0.00025	0.12575	0.12775	0.23775	0.24875	0.30875	0.33475
siRalA+RalB +HGF
-BLANK	BLANK haVb3=	0.03925
1.30575	1.32175	0.00075	-0.00025	0.39975	0.42375	0.63875	0.71475	0.70375	0.71775
1.33175	1.28275	-0.00025	-0.00025	0.39375	0.42475	0.64275	0.65275	0.71075	0.77775
siNT -HGF
100% of tot	tot=	1.38
99.2935	97.337	0.163043	0.0905797	7.62681	9.36594	16.4674	16.25	21.5399	20.4529
103.641	99.7283	0.0181159	-0.271739	7.55435	9.07609	14.3659	14.221	20.7428	21.1051
siNT + HGF
100% of tot	tot=	1.38
99.2935	97.337	0.163043	0.0905797	27.6993	28.4239	48.279	48.7862	58.7138	51.25
103.641	99.7283	0.0181159	-0.271739	29.0036	28.5688	49.5109	47.8442	54.5833	51.25
siRalA+RalB -HGF
100% of tot	tot=	1.3105
99.6375	100.858	0.0572301	-0.0190767	9.59557	9.74819	18.7524	19.1339	23.9412	23.5597
101.622	97.8825	-0.0190767	-0.0190767	9.59557	9.74819	18.1419	18.9813	23.5597	25.5437
siRalA+RalB +HGF
100% of tot	tot=	1.3105
99.6375	100.858	0.0572301	-0.0190767	30.5036	32.335	48.7409	54.5403	53.7009	54.7692
101.622	97.8825	-0.0190767	-0.0190767	30.0458	32.4113	49.0462	49.8092	54.235	59.3476
TOTAL		0 MIN		7.5 MIN		15 MIN		22.5 MIN
siNT -HGF
Mean+-sem
100		0		8.4058		15.3261		20.9601
1.32048		0.0952882		0.474601		0.598558		0.234809
siNT + HGF
Mean+-sem
100		0		28.4239		48.6051		53.9493
1.32048		0.0952882		0.271135		0.358067		1.77188
siRalA+RalB -HGF
Mean+-sem
100		0		9.67188		18.7524		24.1511
0.815552		0.0190767		0.0440557		0.218065		0.47283
siRalA+RalB +HGF
Mean+-sem
100		0		31.3239		50.5341		55.5132
0.815552		0.0190767		0.613131		1.35413		1.29661

## Sheet: D
H1299; siNT versus siRala+Ralb; +/-EGF
cMET
siNT -EGF
1.234	1.079	0.051	0.048	0.122	0.18	0.218	0.198	0.308	0.287
1.292	1.093	0.047	0.049	0.123	0.171	0.23	0.2	0.311	0.282
siNT + EGF
1.234	1.079	0.051	0.048	0.159	0.172	0.227	0.262	0.289	0.266
1.292	1.093	0.047	0.049	0.171	0.215	0.222	0.274	0.288	0.265
siRalA+RalB -EGF
1.19	1.36	0.048	0.046	0.151	0.158	0.232	0.238	0.28	0.307
1.232	1.294	0.045	0.048	0.143	0.167	0.238	0.246	0.28	0.293
siRalA+RalB +EGF
1.19	1.36	0.048	0.046	0.182	0.212	0.22	0.268	0.219	0.286
1.232	1.294	0.045	0.048	0.154	0.178	0.215	0.245	0.229	0.275
siNT -EGF
-BLANK	BLANK haVb3=	0.04875
1.18525	1.03025	0.00225	-0.00075	0.07325	0.13125	0.16925	0.14925	0.25925	0.23825
1.24325	1.04425	-0.00175	0.00025	0.07425	0.12225	0.18125	0.15125	0.26225	0.23325
siNT + EGF
-BLANK	BLANK haVb3=	0.04875
1.18525	1.03025	0.00225	-0.00075	0.11025	0.12325	0.17825	0.21325	0.24025	0.21725
1.24325	1.04425	-0.00175	0.00025	0.12225	0.16625	0.17325	0.22525	0.23925	0.21625
siRalA+RalB -EGF
-BLANK	BLANK haVb3=	0.04675
1.14325	1.31325	0.00125	-0.00075	0.10425	0.11125	0.18525	0.19125	0.23325	0.26025
1.18525	1.24725	-0.00175	0.00125	0.09625	0.12025	0.19125	0.19925	0.23325	0.24625
siRalA+RalB +EGF
-BLANK	BLANK haVb3=	0.04675
1.14325	1.31325	0.00125	-0.00075	0.13525	0.16525	0.17325	0.22125	0.17225	0.23925
1.18525	1.24725	-0.00175	0.00125	0.10725	0.13125	0.16825	0.19825	0.18225	0.22825
siNT -EGF
100% of tot	tot=	1.12575
105.285	91.5168	0.199867	-0.0666223	6.50677	11.6589	15.0344	13.2578	23.0291	21.1637
110.437	92.7604	-0.155452	0.0222074	6.5956	10.8594	16.1004	13.4355	23.2956	20.7195
siNT + EGF
100% of tot	tot=	1.12575
105.285	91.5168	0.199867	-0.0666223	9.79347	10.9483	15.8339	18.9429	21.3413	19.2982
110.437	92.7604	-0.155452	0.0222074	10.8594	14.7679	15.3897	20.0089	21.2525	19.2094
siRalA+RalB -EGF
100% of tot	tot=	1.22225
93.5365	107.445	0.10227	-0.0613622	8.52935	9.10207	15.1565	15.6474	19.0837	21.2927
96.9728	102.045	-0.143179	0.10227	7.87482	9.83841	15.6474	16.3019	19.0837	20.1473
siRalA+RalB +EGF
100% of tot	tot=	1.22225
93.5365	107.445	0.10227	-0.0613622	11.0657	13.5201	14.1747	18.1019	14.0929	19.5746
96.9728	102.045	-0.143179	0.10227	8.7748	10.7384	13.7656	16.2201	14.911	18.6746
TOTAL		0 MIN		7.5 MIN		15 MIN		22.5 MIN
siNT -EGF
Mean+-sem
100		-1.43982e-16		8.90517		14.457		22.052
4.66595		0.0758528		1.36896		0.677963		0.649733
siNT + EGF
Mean+-sem
100		-1.43982e-16		11.5923		17.5439		20.2754
4.66595		0.0758528		1.09058		1.1401		0.590344
siRalA+RalB -EGF
Mean+-sem
100		0		8.83616		15.6883		19.9018
3.0353		0.0613622		0.417684		0.234999		0.527065
siRalA+RalB +EGF
Mean+-sem
100		0		11.0247		15.5656		16.8133
3.0353		0.0613622		0.973523		1.00148		1.35734

## Sheet: E
H1299; siNT versus siRalA+RalB; +/-EGF
TfnR
siNT -EGF
0.724	0.752	0.216	0.102	0.592	0.618	0.637	0.581	0.675	0.718
0.738	0.748	0.231	0.115	0.614	0.64	0.637	0.596	0.681	0.733
siNT + EGF
0.724	0.752	0.216	0.102	0.622	0.675	0.655	0.638	0.674	0.655
0.738	0.748	0.231	0.115	0.652	0.688	0.678	0.662	0.693	0.677
siRalA+RalB -EGF
0.72	0.771	0.192	0.191	0.636	0.636	0.617	0.659	0.632	0.644
0.696	0.756	0.202	0.196	0.639	0.615	0.638	0.672	0.634	0.645
siRalA+RalB +EGF
0.72	0.771	0.192	0.191	0.629	0.618	0.627	0.667	0.65	0.655
0.696	0.756	0.202	0.196	0.616	0.612	0.591	0.656	0.655	0.676
siNT -EGF
-BLANK	BLANK haVb3=	0.166
0.558	0.586	0.05	-0.064	0.426	0.452	0.471	0.415	0.509	0.552
0.572	0.582	0.065	-0.051	0.448	0.474	0.471	0.43	0.515	0.567
siNT + EGF
-BLANK	BLANK haVb3=	0.166
0.558	0.586	0.05	-0.064	0.456	0.509	0.489	0.472	0.508	0.489
0.572	0.582	0.065	-0.051	0.486	0.522	0.512	0.496	0.527	0.511
siRalA+RalB -EGF
-BLANK	BLANK haVb3=	0.19525
0.52475	0.57575	-0.00325	-0.00425	0.44075	0.44075	0.42175	0.46375	0.43675	0.44875
0.50075	0.56075	0.00675	0.00075	0.44375	0.41975	0.44275	0.47675	0.43875	0.44975
siRalA+RalB +EGF
-BLANK	BLANK haVb3=	0.19525
0.52475	0.57575	-0.00325	-0.00425	0.43375	0.42275	0.43175	0.47175	0.45475	0.45975
0.50075	0.56075	0.00675	0.00075	0.42075	0.41675	0.39575	0.46075	0.45975	0.48075
siNT -EGF
100% of tot	tot=	0.5745
97.1279	102.002	8.70322	-11.1401	74.1514	78.6771	81.9843	72.2367	88.5988	96.0836
99.5648	101.305	11.3142	-8.87728	77.9809	82.5065	81.9843	74.8477	89.6432	98.6945
siNT + EGF
100% of tot	tot=	0.5745
97.1279	102.002	8.70322	-11.1401	79.3734	88.5988	85.1175	82.1584	88.4247	85.1175
99.5648	101.305	11.3142	-8.87728	84.5953	90.8616	89.121	86.3359	91.7319	88.9469
siRalA+RalB -EGF
100% of tot	tot=	0.5405
97.086	106.522	-0.601295	-0.786309	81.5449	81.5449	78.0296	85.8002	80.8048	83.025
92.6457	103.747	1.24884	0.13876	82.0999	77.6596	81.9149	88.2054	81.1748	83.21
siRalA+RalB +EGF
100% of tot	tot=	0.5405
97.086	106.522	-0.601295	-0.786309	80.2498	78.2146	79.8797	87.2803	84.1351	85.0601
92.6457	103.747	1.24884	0.13876	77.8446	77.1045	73.2192	85.2451	85.0601	88.9454
TOTAL		0 MIN		7.5 MIN		15 MIN		22.5 MIN
siNT -EGF
Mean+-sem
100		0		78.329		77.7633		93.255
1.08587		5.82141		1.71139		2.49463		2.45484
siNT + EGF
Mean+-sem
100		0		85.8573		85.6832		88.5553
1.08587		5.82141		2.5198		1.44305		1.35647
siRalA+RalB -EGF
Mean+-sem
100		5.14866e-15		80.7123		83.4875		82.0537
3.15101		0.461763		1.02595		2.23362		0.619981
siRalA+RalB +EGF
Mean+-sem
100		5.14866e-15		78.3534		81.4061		85.8002
3.15101		0.461763		0.672931		3.14376		1.07085

## Sheet: F
H1299; siNT versus siRalb+Rala; +/-EGF
a5b1
siNT -EGF
0.997	1.089	0.053	0.048	0.126	0.144	0.223	0.185	0.282	0.323
0.949	1.073	0.058	0.049	0.123	0.141	0.216	0.179	0.289	0.325
siNT + EGF
0.997	1.089	0.053	0.048	0.121	0.153	0.224	0.221	0.332	0.273
0.949	1.073	0.058	0.049	0.122	0.154	0.232	0.21	0.319	0.293
siRalA+RalB -EGF
1.082	1.135	0.052	0.057	0.122	0.135	0.215	0.251	0.258	0.277
1.055	1.131	0.05	0.056	0.123	0.139	0.207	0.256	0.251	0.271
siRalA+RalB +EGF
1.082	1.135	0.052	0.057	0.13	0.124	0.222	0.25	0.33	0.332
1.055	1.131	0.05	0.056	0.122	0.117	0.214	0.245	0.317	0.323
siNT -EGF
-BLANK	BLANK haVb3=	0.052
0.945	1.037	0.001	-0.004	0.074	0.092	0.171	0.133	0.23	0.271
0.897	1.021	0.006	-0.003	0.071	0.089	0.164	0.127	0.237	0.273
siNT + EGF
-BLANK	BLANK haVb3=	0.052
0.945	1.037	0.001	-0.004	0.069	0.101	0.172	0.169	0.28	0.221
0.897	1.021	0.006	-0.003	0.07	0.102	0.18	0.158	0.267	0.241
siRalA+RalB -EGF
-BLANK	BLANK haVb3=	0.05375
1.02825	1.08125	-0.00175	0.00325	0.06825	0.08125	0.16125	0.19725	0.20425	0.22325
1.00125	1.07725	-0.00375	0.00225	0.06925	0.08525	0.15325	0.20225	0.19725	0.21725
siRalA+RalB +EGF
-BLANK	BLANK haVb3=	0.05375
1.02825	1.08125	-0.00175	0.00325	0.07625	0.07025	0.16825	0.19625	0.27625	0.27825
1.00125	1.07725	-0.00375	0.00225	0.06825	0.06325	0.16025	0.19125	0.26325	0.26925
siNT -EGF
100% of tot	tot=	0.975
96.9231	106.359	0.102564	-0.410256	7.58974	9.4359	17.5385	13.641	23.5897	27.7949
92	104.718	0.615385	-0.307692	7.28205	9.12821	16.8205	13.0256	24.3077	28
siNT + EGF
100% of tot	tot=	0.975
96.9231	106.359	0.102564	-0.410256	7.07692	10.359	17.641	17.3333	28.7179	22.6667
92	104.718	0.615385	-0.307692	7.17949	10.4615	18.4615	16.2051	27.3846	24.7179
siRalA+RalB -EGF
100% of tot	tot=	1.047
98.2092	103.271	-0.167144	0.310411	6.51862	7.76027	15.4011	18.8395	19.5081	21.3228
95.6304	102.889	-0.358166	0.2149	6.61414	8.14231	14.6371	19.3171	18.8395	20.7498
siRalA+RalB +EGF
100% of tot	tot=	1.047
98.2092	103.271	-0.167144	0.310411	7.28271	6.70965	16.0697	18.744	26.3849	26.5759
95.6304	102.889	-0.358166	0.2149	6.51862	6.04107	15.3056	18.2665	25.1433	25.7163
TOTAL		0 MIN		7.5 MIN		15 MIN		22.5 MIN
siNT -EGF
Mean+-sem
100		-3.46945e-16		8.35897		15.2564		25.9231
3.36852		0.233131		0.54029		1.12694		1.15004
siNT + EGF
Mean+-sem
100		-3.46945e-16		8.76923		17.4103		25.8718
3.36852		0.233131		0.947909		0.466967		1.3538
siRalA+RalB -EGF
Mean+-sem
100		1.73472e-16		7.25883		17.0487		20.1051
1.85628		0.157786		0.40779		1.18614		0.566897
siRalA+RalB +EGF
Mean+-sem
100		1.73472e-16		6.63801		17.0965		25.9551
1.85628		0.157786		0.256801		0.8339		0.327395
