# Supplementary material for: RAL GTPases mediate EGFR-driven intestinal stem cell proliferation and tumourigenesis
Source: eLife. 2021 Jun 7;10:e63807. doi: 10.7554/eLife.63807 (PMC8216719; doi:10.7554/eLife.63807)
Supplement: Figure 4—source data 1. [file elife-63807-fig4-data1.xlsx]

## Sheet: A
Control		RalA-RNAi(1)
1.00332		1.17325
1.03676		1.13705
0.937708		1.17372
1.12108		1.25662
1.13101		0.989161
1.18184		1.29042
1.09243		1.42577
1.09304		1.04675
0.993894		1.12069
1.06695		1.12767
1.00158		1.1781
1.15638		1.13216
0.747924		0.9373
0.990747		1.09059
1.05028		1.1621
0.908996		1.08604
1.22431		1.09013
0.922421		1.06723
1.10478		1.13226
1.15435		1.13432
1.0632		0.894675
0.864731		1.25018
1.10452		1.49218
0.939731		1.20726
1.17519		1.0845
1.24174		1.1897
1.55438		1.16843
1.18485		1.00149
1.08987		1.30121
1.0312		1.03078
0.907949		1.08371
1.04301		0.890718
0.982128		0.98175
0.990712		1.09481
1.25837		1.15277
0.978284		0.960284
0.92085		1.17376
0.976641		1.15284
0.74742		1.0659
1.0388		0.851751
0.956433		0.865496
0.937584
0.848825
0.876276

## Sheet: D
Control		RalA-RNAi(1)
0.870604		0.834057
0.765297		1.11159
0.742697		0.990357
1.07952		0.829871
0.69685		1.35598
0.886422		0.909511
0.710112		0.830468
1.05563		0.966494
0.898354		0.877194
0.978815		1.08524
0.917758		1.52901
0.868129		0.964718
0.883579		0.939714
0.946304		0.878893
0.75582
0.752873
0.785685
0.74395
0.814874
0.954014
0.858871
1.10603
0.897031
0.741069
0.939638

## Sheet: F
Control		RalAwt(1)
1.0585		0.928332
1.05139		0.95175
1.09177		1.04771
1.1711		1.03705
1.04049		1.05367
1.1921		0.971298
1.02766		0.912762
1.11713		0.948052
1.03102		1.05658
1.0447		0.928814
1.06716		0.955087
1.07985		1.01363
1.05102		1.14394
1.10878		1.11536
		1.09316
		1.05348
		1.01763
		1.01203
		1.00255
		0.991573

## Sheet: G
H1299; siNT versus siRala+Ralb; +/-EGF
EGFR1
siNT -EGF
0.679	0.69	0.04	0.039	0.091	0.1	0.217	0.209	0.206	0.228
0.742	0.756	0.037	0.037	0.096	0.103	0.221	0.215	0.199	0.242
siNT + EGF
0.679	0.69	0.04	0.039	0.229	0.243	0.382	0.366	0.393	0.381
0.742	0.756	0.037	0.037	0.223	0.257	0.368	0.382	0.412	0.398
siRalA+RalB -EGF
0.777	0.795	0.042	0.039	0.094	0.109	0.208	0.206	0.219	0.27
0.735	0.802	0.04	0.041	0.094	0.111	0.206	0.208	0.216	0.253
siRalA+RalB +EGF
0.777	0.795	0.042	0.039	0.205	0.239	0.351	0.36	0.381	0.368
0.735	0.802	0.04	0.041	0.181	0.238	0.318	0.324	0.345	0.358
siNT -EGF
-BLANK	BLANK haVb3=	0.03825
0.64075	0.65175	0.00175	0.00075	0.05275	0.06175	0.17875	0.17075	0.16775	0.18975
0.70375	0.71775	-0.00125	-0.00125	0.05775	0.06475	0.18275	0.17675	0.16075	0.20375
siNT + EGF
-BLANK	BLANK haVb3=	0.03825
0.64075	0.65175	0.00175	0.00075	0.19075	0.20475	0.34375	0.32775	0.35475	0.34275
0.70375	0.71775	-0.00125	-0.00125	0.18475	0.21875	0.32975	0.34375	0.37375	0.35975
siRalA+RalB -EGF
-BLANK	BLANK haVb3=	0.0405
0.7365	0.7545	0.0015	-0.0015	0.0535	0.0685	0.1675	0.1655	0.1785	0.2295
0.6945	0.7615	-0.0005	0.0005	0.0535	0.0705	0.1655	0.1675	0.1755	0.2125
siRalA+RalB +EGF
-BLANK	BLANK haVb3=	0.0405
0.7365	0.7545	0.0015	-0.0015	0.1645	0.1985	0.3105	0.3195	0.3405	0.3275
0.6945	0.7615	-0.0005	0.0005	0.1405	0.1975	0.2775	0.2835	0.3045	0.3175
siNT -EGF
100% of tot	tot=	0.6785
94.4363	96.0575	0.257922	0.110538	7.7745	9.10096	26.3449	25.1658	24.7237	27.9661
103.721	105.785	-0.18423	-0.18423	8.51142	9.54311	26.9344	26.0501	23.692	30.0295
siNT + EGF
100% of tot	tot=	0.6785
94.4363	96.0575	0.257922	0.110538	28.1135	30.1769	50.6632	48.3051	52.2845	50.5158
103.721	105.785	-0.18423	-0.18423	27.2292	32.2402	48.5999	50.6632	55.0847	53.0214
siRalA+RalB -EGF
100% of tot	tot=	0.73675
99.9661	102.409	0.203597	-0.203597	7.26162	9.29759	22.735	22.4635	24.228	31.1503
94.2654	103.359	-0.0678656	0.0678656	7.26162	9.56905	22.4635	22.735	23.8208	28.8429
siRalA+RalB +EGF
100% of tot	tot=	0.73675
99.9661	102.409	0.203597	-0.203597	22.3278	26.9427	42.1446	43.3661	46.2165	44.452
94.2654	103.359	-0.0678656	0.0678656	19.0702	26.8069	37.6654	38.4798	41.3302	43.0947
TOTAL		0 MIN		7.5 MIN		15 MIN		22.5 MIN
siNT -EGF
Mean+-sem
100		0		8.7325		26.1238		26.6028
2.79601		0.110538		0.382915		0.36846		1.46073
siNT + EGF
Mean+-sem
100		0		29.4399		49.5578		52.7266
2.79601		0.110538		1.11921		0.641021		0.945634
siRalA+RalB -EGF
Mean+-sem
100		0		8.34747		22.5993		27.0105
2.04077		0.0876141		0.62936		0.0783645		1.78913
siRalA+RalB +EGF
Mean+-sem
100		0		23.7869		40.414		43.7733
2.04077		0.0876141		1.90296		1.38461		1.03518
