# Supplementary material for: RAL GTPases mediate EGFR-driven intestinal stem cell proliferation and tumourigenesis
Source: eLife. 2021 Jun 7;10:e63807. doi: 10.7554/eLife.63807 (PMC8216719; doi:10.7554/eLife.63807)
Supplement: Figure 5—figure supplement 1—source data 1. [file elife-63807-fig5-figsupp1-data1.xlsx]

## Sheet: A
ddCt Rala-ActB
T4-2 (parental)	shScr	shRala	shRalb
1.00774	0.905555	0.058843	0.989214
0.871661	0.924866	0.064424	0.921215
1.13843		0.108893	1.06389
Raw data
Ct ActB
T4-2 (parental)	shScr	shRala	shRalb
14.4451	14.2535	15.4405	14.2479
13.9535	14.1575	15.5493	14.2022
15.2695		15.5164	14.8779
Ct Rala
T4-2 (parental)	shScr	shRalA	shRalB
21.5851	21.5478	26.6787	21.4147
21.3029	21.4214	26.6568	21.4718
22.2336		25.8666	21.9397

## Sheet: B
ddCt Ralb-ActB
T4-2 (parental)	shScr	shRala	shRalb
0.936748	0.91755	0.958473	0.115693
1.05191	0.938319	1.25651	0.169016
1.01485		1.23084	0.15595
Raw data
Ct ActB
T4-2 (parental)	shScr	shRala	shRalb
14.4451	14.2535	15.4405	14.2479
13.9535	14.1575	15.5493	14.2022
15.2695		15.5164	14.8779
Ct Ralb
T4-2 (parental)	shScr	shRala	shRalb
22.3666	22.205	23.329	25.1869
21.7078	22.0767	23.0472	24.5943
23.0755		23.0441	25.3861
