# Supplementary material for: RAL GTPases mediate EGFR-driven intestinal stem cell proliferation and tumourigenesis
Source: eLife. 2021 Jun 7;10:e63807. doi: 10.7554/eLife.63807 (PMC8216719; doi:10.7554/eLife.63807)
Supplement: Figure 5—source data 1. [file elife-63807-fig5-data1.xlsx]

## Sheet: A
+		RalA-RNAi (2)
33		28
46		21
32		34
35		35
41		13
25		53
29		28
38		64
74		22
33		18
17		16
22		8
36		19
31		27
32		15
17		9
27		28
30		24
28		17
38		24
36		23
22		20
33		25
35		17
28		17
36		36
33		25
19		28
42		15
52		19
39		14
22		26
33		24
20
50
28
29
31
34

## Sheet: D
Control			Src64wt
Control			Control	RalA-RNAi (2)
1.09454			1.95131	1.27658
0.935742			1.53257	1.48185
0.894755			1.4875	0.871463
1.10297			1.58747	1.50268
0.964048			1.54039	1.21088
1.00258			1.65495	1.46949
1.17919			1.20472	1.36288
0.967139			1.40155	0.859645
0.947214			1.31353	1.34134
0.995899			1.2147	0.766024
0.915925			1.08772	0.963315
			1.22162	1.04831
			2.01906	0.987008
			1.45506	1.34947
			1.04844	1.24731
			1.21891	1.35988

## Sheet: F
Control			Src64wt
+			+	RalA-RNAi (2)
1.63202			1.14085	0.826088
1.10044			1.65575	0.760786
1.22904			2.52219	1.04798
0.807012			1.98424	0.698568
0.611488			1.53998	1.06343
0.620004			1.32721	1.04372
1.04036			2.40214	1.47166
1.55073			1.71404	1.7951
1.01471			1.16027	2.05615
1.27716			1.95951	1.1344
1.29844			1.34221	1.23028
0.548118			1.57654	1.31485
0.616679			1.72655	1.05341
0.726571			1.58447	1.03333
0.927228				0.768759
				0.797149

## Sheet: H
		Src64wt; EGFRwt
control				RalA-RNAi(2)
0.929376				1.00945
0.921026				0.976356
0.919883				0.928606
0.949052				1.02501
0.969927				1.2116
0.948018				1.00755
1.01606				1.26588
1.11777				1.31522
0.929879				1.07287
0.942478				1.19775
				0.895914
				1.03671

## Sheet: J
EtOH		DMSO		AG1478 80 nM		Erlotinib 10 nM
1610.81		777.634		722.089		810.391
1287.15		1926.64		810.391		576.104
1538.53		1746.47		360.688		782.263
610.286		1235.88		469.642		663.339
975.603		1262.23		489.582		803.982
902.611		1039.34		397.362		542.279
1345.55		2623.45		442.226		328.643
716.036		932.876		454.688		652.301
1078.5		1043.25		398.787		728.498
871.634		743.452		454.332		607.081
1547.79		750.929		666.543		558.657
1552.78		607.437		513.082		359.62
964.921		812.884		392.378		370.658
1803.8		2202.58		505.248		398.074
1339.14		1372.25		582.869		587.498
625.24		1214.87		479.256		655.862
2722.79		740.604		523.407		379.915
1975.42		1487.62		452.552		485.665
1174.64		957.8		383.12		576.816
744.876		570.407		311.552		890.149
785.467		1966.52		360.688		644.824
1885.33		1749.68		477.832		341.105
1298.55		2176.95		431.188		813.24
993.762		628.801		416.946		429.052
1074.23		2046.99		389.529		1012.63
585.006		3423.51		595.331		478.544
1344.12		1517.53		310.128		933.944
593.195		1304.25		620.612		332.916
754.49		516.642		387.393		666.899
464.302		648.384		320.097		483.529
3025.79		1011.21		586.074		825.346
1326.32		529.46		620.968		1256.53
782.619		1471.59		590.703		354.279
1356.59		1208.11		994.83		405.196
734.195		789.384		744.164		370.302
1133.69		1326.68		343.597		366.029
1963.67		1032.57		529.46		599.604
1872.52		1307.45		545.127		750.217
3603.68		1531.41		613.846		866.293
1204.55		1078.15		550.468		413.741
544.059		1616.87		493.854		557.233
406.264		933.588		468.93		903.679
646.248		2569.33		588.21		568.627
2371		1170.37		561.862		718.172
316.893		946.406		427.627		469.286
945.694		1035.06		340.749		815.02
892.641		1465.54		748.081		441.158
1258.31		832.467		335.764		388.461
1017.26		1469.81		498.127		301.226
793.657		2300.86		889.793		403.771
566.847		2249.23		653.725		707.846
1431.72		910.088		937.505		505.96
474.271		2750.56		402.703		697.52
910.088		1123.37		693.604		684.702
1114.82		532.665		456.112		499.551
1996.78		1313.86		614.559		421.218
1526.07		754.134		428.696		404.484
2011.02		444.362		321.166		365.317
1147.22		1479.78		307.279		550.824
1158.62		1579.48		408.4		815.732
867.005		822.141		566.135		560.082
1774.96		848.134		359.976		422.999
1291.78		1170.01		553.672		555.453
1140.81		1459.84		349.294		846.353
1298.9		688.263		727.073		629.157
1469.81		2469.63		335.764		742.028
1250.48		1251.19		595.687		472.135
1200.28		752.354		477.832		561.862
1090.61		2040.58		324.37		342.885
1119.45		471.779		440.089		567.915
651.589		1288.22		552.604		373.862
621.324		1691.99		545.483		369.234
548.688		1511.12		516.998		425.135
711.051		1543.87		393.802		466.438
1131.56		388.461		391.309		318.673
1570.93		1607.25		822.141		425.847
686.483		1427.44		328.643		603.521
1086.34		1584.11		593.195		564.354
1506.49		1447.38		369.234		578.597
445.074		1328.46		417.658		398.074
900.118		1854.71		474.983		547.619
1518.59		904.035		418.726		505.604
1811.99		441.87		320.454		419.438
1343.41		334.34		598.536		304.075
1416.76		997.679		455.4		325.438
1334.51		959.58		498.127		423.711
1914.53		1559.54		505.96		364.961
724.937		796.505		366.029		653.369
705.71		796.861		377.423		785.467
906.527		605.301		569.339		594.263
1224.49		941.065		671.528		665.475
1506.13		1454.5		324.014		584.294
371.726		822.853		523.051		510.589
1522.87				580.377		856.323
1501.86		1601.56		478.544		508.809
1520.37		1429.93		521.271		624.884
879.467		5157.88		589.278		462.521
1815.55		613.49		816.8		533.733
2163.06		1934.47		393.802		364.605
1733.65		2424.41		324.37		342.173
313.688		712.475		389.885		617.763
1633.24		734.907		509.521		420.15
923.974		1124.44		528.392		434.749
1394.33		2749.85		801.49		442.582
917.209		1914.89		416.234		592.127
601.74		861.308		317.605		432.612
681.142		1150.78		553.316		509.521
3345.89		3453.42		351.787		1045.39
2190.12		1519.66		411.249		351.431
561.862		1458.42		467.15		776.21
554.029		605.301		589.278		677.937
1272.2		683.278		350.006		458.961
1187.81		1797.74		472.491		411.249
2587.48		1630.75		336.476		397.006
2379.19		937.861		492.074		813.24
1557.76		1425.66		625.24		330.423
1231.97		2021.35		301.582		483.885
346.446		1178.56		449.703		386.681
1367.62		1099.16		557.233		377.779
1124.08		833.535		398.074		620.256
1499.72		1535.68		453.264		500.264
692.892		1616.15		344.666		844.929
1318.49		827.838		367.453		790.808
318.673		1236.95		524.12		779.77
556.165		819.293		318.673		545.127
1064.26		2342.52		481.392		300.158
1791.34		541.566		352.143		384.9
673.664		572.544		685.414		403.059
1238.37		567.915		703.573		316.893
808.611		2222.88		436.885		335.408
1673.84		2582.5		409.468		571.475
1243.36		1772.46		323.658		426.915
2275.22		921.482		585.718		436.173
983.08		1041.83		590.703		336.832
692.18		1622.21		656.574		990.913
735.619		1497.59		366.741		677.225
798.285		977.383		502.044		368.165
1046.81		1606.54		353.923		444.362
941.065		2144.55		381.696		414.097
651.945		2079.39		1047.53		662.627
1189.95		1489.04		404.484		1230.54
1490.11		993.762		378.847		660.134
1160.75		1336.65		535.157		593.907
1627.9		1003.73		404.84		441.87
1082.06		995.898		480.68		739.892
1192.09		1340.92		550.468		462.521
959.936		565.778		514.15		732.058
1411.42		1293.56		528.392		621.324
526.968		1951.21		339.325		655.149
759.475		868.429		607.793		400.923
1544.23		1941.59		508.809		449.347
2032.39		1254.04		513.082		307.279
1306.74		776.922		513.438		440.089
871.277		3792.75		340.393		753.422
1521.44		1858.27		625.24		628.801
987.709		518.067		904.391		732.414
999.103		931.095		306.567		895.846
435.461		883.027		560.438		530.173
389.173		1424.95		546.195		314.4
1404.65		964.921		394.514		350.363
1860.77		641.619		617.763		318.673
769.088		1753.95		520.203		324.37
1421.75		982.368		805.763		956.732
1308.52		1158.26		437.953		769.444
815.376		1256.89		495.635		554.385
493.498		1662.8		407.332		841.725
1187.46		2023.84		800.778		514.506
1224.49		1472.31		444.718		368.878
1293.56		903.323		419.082		818.581
1181.76		679.361		379.915		755.202
1414.27		1701.96		596.756		428.34
1350.53		2179.08		561.506		425.135
1147.22		340.749		578.953		567.203
1089.19		926.111		734.551		340.749
1567.37		1066.75		471.779		333.628
1582.33		1619.36		592.483		708.914
1746.47		1256.53		396.65		484.953
1634.31		1114.82		686.839		681.498
307.991		1103.43		566.135		938.217
1427.09		2053.75		405.908		513.794
1740.06		749.149		1102		405.552
1402.16		774.073		314.4		472.491
1594.79		1586.6		453.976		328.643
522.339		733.126		433.68		625.596
897.982		2167.69		359.976		403.059
2519.83		1549.57		507.385		351.787
1162.89		1466.25		519.847		779.77
2103.96		1735.08		301.938		325.438
1146.87		1070.67		625.596		419.438
753.066		1169.3		339.325		497.415
716.392		359.976		575.036		333.272
2547.61		2711.75		488.514		483.885
897.626		645.892		913.649		816.444
1436.34		483.529		301.938		743.096
1678.46		828.55		479.256		369.234
2332.9		1918.8		561.506		503.824
2586.06		1680.96		406.264		468.574
1632.53		1319.91		436.529		379.559
358.196		509.521		497.059		589.278
1332.37		1807		558.301		723.869
1627.9		844.929		360.332		478.544
345.378		1895.3		346.802		510.233
1365.49		1071.74		399.855		754.846
777.99		1096.31		486.733		1120.52
1371.18		764.104		317.605		366.741
1151.14		1836.2		346.09		314.044
2962.06		2247.8		608.506		503.468
1883.91		1393.62		538.006		654.081
542.279		1286.09		670.46		575.036
1012.63		1250.12		319.029		444.362
1266.5		990.557		574.68		491.362
815.376		495.279		494.923		538.006
650.877		1420.32		346.446		369.59
328.999		777.278		347.158		393.09
537.65		2667.6		525.544		360.332
946.762		2809.67		366.029		744.876
1904.21		972.398		569.339		741.316
1153.63		1367.27		420.506		599.604
850.982		660.49		309.06		347.158
410.18		1275.76		421.93		341.817
460.029		1803.8		594.619		907.239
1807.36		1131.2		544.771		614.915
657.642		1226.62		369.59		467.15
359.976		1574.49		628.801		371.014
1698.05		1262.59		561.15		779.414
1121.23		1135.47		435.461		326.507
1850.8		953.171		383.476		674.021
1627.9		2077.61		357.128		465.726
782.619		1110.19		491.006		799.353
401.635		1518.24		391.665		593.907
777.99		683.278		466.082		479.256
319.385		844.929		434.393		520.559
611.354		478.544		507.741		474.627
2200.8		1430.29		461.453		336.832
1710.87		5384.33		608.15		330.779
1329.88		1824.45		659.422		647.316
1369.76		683.634		333.272		329.711
801.134		1166.81		606.369		620.256
1149.36		1093.1		408.4		900.83
1073.16		1766.41		549.044		470.355
853.118		720.308		403.415		416.946
2220.03		1151.5		411.249		560.438
1383.65		615.271		907.952		341.817
557.233		1189.24		448.279		481.392
2126.03		1724.4		584.65		352.143
679.005		1731.16		668.68		651.589
838.876		1533.55		578.597		310.484
2111.79		698.233		492.074		677.225
1459.84		1197.78		474.983		376.355
1065.33		1579.84		348.226		374.575
1141.88		696.096		463.945		486.021
904.391		1021.18		531.241		897.982
612.778		341.817		568.983		581.801
603.165		1874.65		354.279		475.339
413.741		1537.46		343.597		549.044
837.452		1271.13		337.544		951.035
575.036		1583.4		463.589		569.695
1245.85		867.005		303.719		310.84
1056.07		931.095		439.021		447.923
512.013		2571.11		362.112		314.044
2665.11		1771.04		415.165		529.816
765.172		1343.06		660.846		468.218
1116.25		2624.51		552.248		544.771
		1193.16		453.62		692.892
572.188		780.838		389.529		442.582
344.666		1712.29		347.514		526.968
1116.25		1102.36		609.93		732.058
1591.59		666.187		520.559		657.642
1312.44		769.444		496.703		351.787
740.96		701.081		355.347		725.293
1132.98		1218.08		395.938		620.256
699.657		807.899		598.536		878.755
917.921		1135.83		459.317		363.893
1440.97		420.862		502.044		630.581
988.065		1695.91		491.006		625.953
945.338		457.892		597.112		839.944
1426.37		1714.43		723.513		304.787
1094.88		828.906		392.378		406.976
1113.4		1162.89		323.302		457.892
1521.44		801.49		530.885		899.762
988.065		3361.2		554.385		616.339
1050.73		1339.5		491.006		562.574
750.573		2427.97		867.361		398.074
507.741		356.772		512.37		598.892
1515.75		719.596		775.141		395.582
999.459		986.285		439.377		519.847
1243.36		1341.63		454.332		423.355
1229.47		412.317		352.143		367.453
476.408		1372.61		726.005		520.203
1448.81		1752.52		325.794		697.164
1644.28		1747.54		345.022		741.672
880.535		909.732		370.302		474.271
834.603		1341.63		304.431		497.771
2061.94		985.929		481.392		444.362
638.415		366.385		302.294		474.983
1021.89		1922.36		379.203		609.574
631.293		791.876		980.944		389.173
671.172		2050.9		561.862		324.37
2139.21		1625.41		633.074		333.272
1637.16		937.861		441.87		346.09
859.171		1138.68		318.317		345.734
1588.74		763.391		520.559		563.286
1347.69		2029.18		479.612		790.808
1969.01		1569.51		556.877		368.522
1126.57		1173.57		492.43		310.484
1737.93		1181.05		335.408		424.067
679.717		894.065		316.893		325.082
1536.75		1226.62		545.483		356.416
868.429		692.18		670.104		410.18
1528.92		781.194		540.498		534.801
392.734		433.324		321.878		593.195
342.173		717.104		388.105		324.726
1898.51		1353.38		303.363		384.544
602.809		1637.87		310.84		384.544
889.437		1585.89		784.755		377.067
1921.3		1159.33		330.067		1214.52
943.914		902.255		513.438		737.043
1299.26		830.687		701.437		365.673
2413.37		715.323		395.938		467.862
1405.37		1219.15		450.415		331.847
364.605		562.574		584.65		570.407
847.065		842.793		744.876		354.279
2031.68		519.491		546.195		535.869
884.808		513.082		328.287		589.634
903.679		392.378		520.203		603.877
565.066		1087.76		419.438		592.127
1402.52		518.067		764.816		568.271
1170.37		320.454		504.892		757.695
1350.89		1052.87		773.005		528.036
514.506		547.263		342.529		572.9
429.052		1391.12		907.952		455.4
451.839		650.521		415.165		922.906
736.331		1369.4		472.491		468.218
1955.83		1513.61		634.142		763.748
1458.42		856.679		328.643		422.643
1125.5		1330.95		613.846		403.771
1333.09		727.073		300.158		839.944
1256.89		378.491		436.885		681.498
559.013		1193.51		513.438		443.65
876.262		584.294		562.93		419.082
1255.47		801.49		902.611		488.87
930.027		1905.99		471.779		464.658
825.702		4658.33		627.377		334.696
1816.26		1947.65		314.044		520.203
1179.98		350.719		577.172		444.006
582.869		510.589		567.203		592.127
1663.51		1428.87		739.535		671.172
1498.65		1632.18		646.604		350.363
1462.69		1328.1		345.734		493.854
980.944		1525		352.143		444.006
583.938		1160.4		319.741		320.81
1034		1158.97		536.226		594.263
1517.88		1816.26		475.695		651.233
640.195		1468.03		510.945		650.165
1633.6		684.702		333.984		595.331
2418.36		3722.96		500.62		503.468
1418.9		922.194		456.468		311.552
2149.53		587.142		469.286		559.369
896.558		1455.21		376.355		861.664
801.49		1526.78		397.718		749.505
962.073		381.34		636.634		312.264
1396.11		2811.09		338.613		323.658
700.013		963.853		510.945		447.211
1351.6		1396.82		397.718		703.217
928.603		488.514		601.74		689.331
1853.65		595.331		499.195		405.908
347.514		1380.44		443.294		829.975
1412.13		375.643		503.112		559.013
1435.63		1240.16		619.187		975.959
4402.68		1020.47		408.756		745.232
1363		683.99		368.878		491.006
1884.62		1012.99		475.695		813.596
1392.9		971.33		667.968		383.12
1535.68		878.399		355.703		858.459
2559.71		918.633		338.969		432.256
1689.86		1809.85		344.666		1073.88
2026.69		2137.07		366.385		343.597
500.62		1867.18		336.12		393.09
1422.81		1089.19		397.718		836.028
1117.31		899.762		370.658		335.764
1150.78		3521.07		587.498		486.377
1035.06		994.474		518.779		547.975
1507.2		1362.28		507.385		670.816
1200.99		1124.08		551.18		346.802
4332.89		1512.54		431.188		628.089
701.081		619.9		611.71		418.014
982.368		716.748		525.544		505.248
1104.14		2521.26		446.499		514.15
524.12		2635.55		307.991		526.968
2682.91		899.05		377.423		944.27
653.369		951.391		447.923		488.514
858.459		3966.86		340.037		442.582
1127.64		1392.55		500.264		528.036
2082.59		1602.27		683.99		454.688
536.226		3676.31		388.105		515.389
1068.89		1535.33		397.362		693.531
847.421		1612.95		350.719		565.312
1918.8		2957.79		349.65		316.057
690.755		888.368		378.491		808.101
866.649		1232.68		455.044		766.08
383.832		1722.26		325.082		452.896
1518.59		1637.52		465.014		314.262
1436.7		1960.82		423.711		637.502
1343.77		1201.34		506.673		605.896
1317.78		2124.25		507.029		311.748
635.21		3093.44		752.354		834.32
2370.64		1020.82		526.968		727.291
591.059		1311.01		674.021		348.741
1133.34		523.407		419.794		395.79
2033.81		1244.78		640.907		516.467
1008.72		778.346		389.529		465.826
1960.11		1576.99		546.551		620.263
1207.04		2054.82		461.097		400.459
1285.37		3280.02		559.369		332.938
946.05		1071.74		339.681		465.107
1409.28		779.058		659.422		342.994
995.186		2318.66		390.953		370.649
860.24		1828.01		423.711		413.748
1110.19		741.672		652.657		495.636
791.164		3570.56		363.893		688.862
770.513		676.157		505.248		342.994
1687.37		1105.21		500.62		664.08
665.119		882.671		361.756		413.389
921.126		906.527		446.499		614.157
1599.42		1374.03		368.165		528.678
551.892		1219.5		395.582		561.361
560.794		1002.31		625.953		326.473
612.778		829.262		498.127		632.115
469.417		1097.73		436.173		386.811
1179.47		3428.85		1089.19		323.241
796.968		832.823		492.786		730.883
1901.37		1142.24		488.158		487.016
1536.83		561.15		427.627		458.283
366.698		1202.77		327.931		320.726
922.313		1529.63		373.862		630.319
1383.47		3019.38		366.741		510.361
596.558		300.514		536.582		744.89
2657.76		1795.25		451.483		394.353
350.536		573.256		708.202		648.277
663.361		468.93		418.37		577.523
1679.77		883.74		395.226		582.91
558.847		626.309		499.907		641.812
1137.09		1002.31		494.567		317.853
551.305		1001.24		434.036		651.868
882.447		651.233		635.21		1109.43
1023.6		1527.5		474.627		548.791
954.637		1059.99		402.703		319.649
1846.42		1392.9		506.317		451.818
532.269		681.142		693.604		695.686
457.924		414.097		670.46		622.059
707.538		304.787		507.385		984.447
538.734		1189.59		302.651		718.312
569.622		1091.68		575.036		556.333
845.454		1200.99		573.968		717.953
856.228		371.37		385.256		690.298
1088.24		905.459		490.65		560.284
623.136		528.392		465.37		325.396
1040.83		943.914		385.968		785.475
657.974		1500.43		359.976		411.593
951.764		2316.88		505.604		835.756
1444.53		1722.26		582.157		1050.17
820.313		803.626		389.885		483.783
1075.67		844.929		516.286		583.988
1505.58		1444.53		619.187		825.341
2346.73		1610.81		365.673		831.806
1072.8		1762.85		493.498		470.135
726.932		1285.37		473.203		853.355
1151.1		1414.62		356.416		481.988
1469.67		1600.49		400.211		488.452
1597.53		822.853		545.127		359.515
452.537		2139.56		604.945		795.89
2112.56		927.535		377.779		391.48
659.411		422.999		502.4		589.734
1230.47		2004.97		739.892		912.616
551.305		506.673		379.915		351.973
1496.96		555.809		604.945		564.594
1498.4		2408.74		482.105		718.672
1311.64		901.186		519.847		478.755
508.924		1864.68		597.468		423.804
407.642		641.975		486.733		697.481
1244.48		444.006		730.99		405.487
427.037		934.656		498.483		772.545
412.67		523.763		362.469		570.34
1132.42		541.21		385.968		766.08
304.564		538.006		468.218		792.299
1444.89		490.65		360.332		400.1
362.029		600.316		482.461		589.734
579.319		580.733		477.12		571.058
404.769		671.172		416.59		500.305
615.953		736.331		330.779		544.84
840.425		428.34		319.029		587.939
759.974		845.641		463.945		848.686
1194.19		1479.07		666.899		661.566
1316.31		1691.64		355.703		606.256
1940.52		668.324		519.135		657.974
493.481		1217.37		313.332		494.558
1182.7		1928.42		518.423		504.255
933.806		1831.57		357.84		503.178
862.693		1349.82		370.302		459.72
1275.72		1243		693.96		343.353
1587.47		714.255		312.264		379.269
613.08		1215.59		424.779		309.233
1050.89		1513.96		588.922		326.114
936.32		2213.62		476.051		507.488
836.475		1850.8		838.164		313.184
944.94		1082.42		369.234		370.649
1023.6		2042		616.695		490.248
2269.15		1021.53		337.188		416.98
1180.91		1068.18		445.43		724.418
1703.84		644.468		386.681		743.812
673.777		738.467		301.938		1501.63
949.25		859.884		427.271		322.163
926.982		1635.74		578.953		591.171
397.586		1444.89		439.377		791.58
962.539		1913.11		425.847		483.783
603.023		1482.28		394.87		378.191
506.41		900.474		494.211		835.038
437.811		716.392		450.415		571.417
1141.4		1399.67		324.37		485.22
824.263		1182.83		461.453		441.403
358.797		1204.19		474.271		548.791
620.263		1799.52		327.575		465.107
1563.77		495.635		448.991		420.213
867.721		902.967		796.149		377.832
368.494		1197.43		476.051		361.311
717.953		1580.9		560.794		685.27
488.812		809.323		509.877		417.339
1564.84		2459.3		520.203		454.333
3227.38		906.527		305.143		392.917
1539.34		1136.54		319.029		579.319
835.397		1397.53		586.786		630.319
1069.57		2455.74		464.302		560.284
6791.64		1131.2		350.363		451.818
402.973		609.93		730.99		682.756
836.834		1712.29		489.938		488.452
750.996		1497.94		565.066		785.115
999.891		921.838		480.68		912.257
1050.17		652.301		378.847		429.551
713.284		1132.63		586.074		426.678
405.846		344.309		334.34		444.276
1053.41		496.703		377.779		847.249
867.362		1642.5		603.877		605.178
1036.88		690.755		549.044		570.34
1321.69		785.823		426.203		371.008
1435.19		1234.46		509.877		336.17
898.609		860.952		526.968		851.918
423.086		1817.68		641.263		682.756
697.84		628.801		341.105		654.023
792.299		1341.28		797.217		350.536
1300.5		1685.94		350.363		533.347
647.199		1199.92		394.158		440.325
619.904		1026.52		405.908		567.826
599.432		2391.3		921.838		495.995
1243.04		596.756		387.393		438.889
834.32		460.385		328.643		511.438
826.418		1249.41		403.059		409.797
803.792		2113.57		373.15		413.748
1592.14		979.52		336.12		349.1
607.333		507.385		321.522		514.312
436.734		858.103		349.294		963.975
767.517		1805.93		694.672		507.488
517.185		1764.99		555.809		311.388
704.664		359.264		382.408		503.178
709.693		923.262		410.18		494.917
761.411		1001.24		467.15		831.447
684.552		3944.78		448.279		587.939
664.439		1402.16		770.157		374.241
725.136		1387.92		568.983		308.874
957.87		1225.56		356.772		538.734
1538.98		820.005		407.688		466.185
4472.57		938.929		351.431		303.846
519.34		1457.71		387.393		318.931
995.581		1247.63		430.832		716.157
1338.22		1616.15		771.225		489.889
947.095		1662.09		391.665		408.72
374.6		955.664		418.014		653.305
623.854		1210.25		355.703		535.502
395.79		2801.83		375.287		816.362
979.06		1367.27		332.916		619.185
918.722		1607.96		433.68		768.953
753.51		309.772		659.778		762.848
879.933		364.605		471.423		725.855
605.537		903.679		464.302		488.093
614.157		852.05		356.059		429.551
555.615		1943.02		411.249		824.982
2120.46		1407.5		602.809		517.903
1093.63		862.02		356.772		357.36
1218.26		1048.24		578.241		401.537
1557.66		510.589		615.627		661.925
315.339		886.232		340.393		362.748
793.376		1534.26		446.142		663.002
1132.42		912.224		387.037		540.171
1334.62		1348.04		606.725		388.607
1465		939.641		448.279		652.228
874.545		1512.18		393.802		745.967
1754.12		1871.09		369.946		853.714
1596.09		1861.83		432.968		664.439
1373.77		1544.59		967.057		699.995
744.89		1137.25		438.665		748.481
496.354		1856.85		498.483		929.137
480.551		942.133		686.127		581.474
881.01		1435.28		414.809		529.755
2000.86		735.975		559.013		683.833
1161.87		868.785		448.635		306.36
690.298		761.611		370.302		817.08
1054.48		566.847		485.309		481.988
437.811		1388.63		751.998		695.326
379.269		888.368		601.384		824.263
711.488		972.042		600.672		538.734
1408.61		549.4		496.703		595.481
813.13		620.612		502.4		580.037
543.044		1643.57		448.635		565.671
712.925		1580.9		391.665		850.482
511.438		795.437		547.619		529.037
1680.13		1139.03		925.399		342.635
1290.81		1046.46		495.635		494.917
984.088		1122.66		597.824		322.881
387.889		1295.34		401.279		359.875
1331.03		2364.95		316.893		897.172
347.663		1441.33		392.378		494.917
581.115		1754.66		314.4		319.29
583.629		1277.54		615.953		305.642
1705.99		909.02		678.446		405.128
1116.26		2123.18		566.03		372.086
974.391		936.792		363.107		414.466
804.869		1567.73		668.031		385.375
1431.6		691.467		452.896		569.981
696.045		1424.59		574.291		480.551
1265.31		364.249		517.903		673.059
852.637		2554.73		385.375		362.389
907.947		2191.55		575.368		497.431
403.332		1000.88		572.854		336.17
628.523		398.074		363.107		483.065
624.213		4130.65		644.326		568.903
814.925		1235.88		474.804		446.431
761.052		1266.15		894.299		383.22
381.783		612.778		1225.08		374.959
379.269		3205.25		473.368		377.832
1635.6		1149.36		842.94		547.354
1088.96		1466.61		709.693		386.811
703.587		2420.14		523.65		575.009
471.213		1065.69		493.84		325.396
1591.06		829.619		661.925		470.135
562.079		1393.26		575.368		427.037
1164.03		1555.62		645.404		366.698
668.39		729.566		418.417		453.614
972.954		1061.41		440.325		436.734
550.586		1244.43		517.185		447.868
468.699		1111.26		566.748		569.263
1646.01		760.543		599.791		657.615
845.454		1117.31		390.403		312.107
481.269		993.05		500.305		593.326
1226.52		756.27		401.537		355.205
771.827		2275.93		815.285		418.058
364.903		627.733		429.192		337.248
694.967		482.105		339.043		344.431
525.805		1993.22		474.086		334.374
526.882		1773.89		401.537		448.586
1000.61		1334.51		423.086		303.846
1012.1		597.468		758.538		470.495
349.818		2138.85		472.65		303.487
1222.21		1634.67		322.163		459.361
790.144		1698.4		543.403		600.509
1347.55		1385.07		434.579		443.199
703.946		786.179		355.205		315.339
3132.92		1133.69		627.087		356.283
1105.48		718.528		555.974		323.241
447.509		2747.71		563.516		300.255
651.509		1333.8		612.72		757.82
1164.38		2068.71		874.186		441.403
344.072		4393.56		326.473		358.438
1305.89		637.143		337.966		489.53
657.615		1446.68		618.826		473.368
591.889		845.454		500.664		402.614
1468.95		346.586		359.515		413.748
942.785		341.558		647.199		466.544
1631.29		646.84		677.009		615.594
354.846		454.333		380.346		510.361
1068.49		342.635		463.311		478.755
631.397		4071.39		515.03		614.875
1064.54		898.25		345.867		501.741
393.635		691.017		503.178		451.459
920.158		998.813		426.678		498.868
762.848		871.313		416.98		386.093
558.129		691.017		303.128		646.122
793.017		388.607		666.594		427.037
1736.52		888.193		416.98		734.834
882.447		1053.76		527.241		409.797
967.208		452.178		916.926		392.558
1379.88		1074.24		642.171		396.508
1611.89		583.988		521.495		306.001
1481.16		401.896		472.29		500.305
357.001		626.009		510.361		473.368
636.425		1062.02		427.037		698.918
1259.56		718.672		506.41		530.474
766.439		1359.41		632.833		386.093
743.094		1159.36		531.551		344.79
349.818		994.863		528.678		925.905
1124.52		1081.78		583.629		646.122
486.657		582.551		331.86		585.425
323.6		481.988		756.024		691.376
340.48		586.861		381.065		335.093
385.375		814.925		474.445		717.235
678.805		774.7		313.543		679.524
1451.35		905.792		411.952		722.263
639.298		483.424		366.698		541.967
652.228		1832.77		623.495		532.629
310.311		565.312		442.84		409.797
755.665		715.08		589.016		569.622
1530.01		505.333		483.783		347.304
361.311		833.602		647.199		712.566
652.587		680.242		525.086		337.607
1101.89		344.072		677.009		317.135
1478.65		1796.14		406.206		494.917
1246.63		1051.61		363.107		508.206
412.67		648.636		631.756		363.825
2302.91		604.819		326.114		314.98
2380.85		801.277		613.798		422.368
622.418		1253.1		795.531		913.693
2302.55		439.966		300.973		471.931
1232.26		939.912		451.1		350.896
548.791		587.939		668.749		480.91
1388.5		511.438		347.304		365.98
677.009		1456.02		1327.44		486.297
906.151		1005.64		393.276		400.459
2268.43		794.453		529.396		363.825
2280.28		386.811		301.691		413.389
1024.31		1490.86		642.89		364.544
709.693		710.411		498.509		333.297
837.911		314.262		337.966		517.185
616.312		452.896		879.574		1122
520.417		441.762		363.466		409.438
314.98		1490.5		500.305		826.778
573.213		888.193		501.023		466.185
878.496		406.565		650.073		849.404
1503.79		2259.09		350.896		1023.95
851.559		1070.64		535.143		385.375
497.79		357.36		350.177		449.304
938.834		1303.02		411.234		394.713
983.01		464.748		396.508		464.03
655.46		465.826		448.227		336.889
545.199		802.355		604.819		562.798
726.932		544.122		332.579		836.834
1005.28		821.749		473.727		740.58
934.165		595.481		683.833		396.149
1336.78		815.644		439.966		420.213
740.221		341.198		397.227		536.22
1809.43		855.869		562.798		582.192
2434.72		720.826		411.234		1024.31
367.776		409.797		572.854		494.199
887.116		1059.87		407.642		396.508
1099.74		470.854		330.783		516.826
335.452		786.193		522.213		391.121
1291.17		464.389		648.995		569.263
1635.96		502.1		417.699		848.327
831.806		1418.31		592.249		761.052
953.919		656.178		466.185		692.812
703.946		696.763		374.959		559.565
664.798		1072.8		400.818		317.494
400.818		883.883		474.086		648.636
957.87		926.264		597.995		765.003
852.278		620.263		816.721		539.453
960.024		745.608		341.917		346.227
1063.82		340.839		550.946		538.375
796.249		577.164		386.093		405.846
1053.76		401.896		480.192		464.748
1155.41		836.475		482.706		847.968
1461.77		467.981		652.587		659.052
398.663		320.008		500.305		1007.79
446.79		735.552		519.34		448.945
1056.28		469.776		484.502		793.735
1917.89		1023.6		591.889		507.847
1106.92		944.94		1137.81		448.227
2258.73		782.601		751.714		384.656
348.022		315.339		561.361		336.529
1338.93		470.854		775.777		689.58
897.531		386.811		302.05		400.818
3545.23		673.418		437.452		628.164
498.509		543.403		344.431		786.193
2529.18		869.158		336.17		326.832
565.312		709.333		385.015		355.205
570.34		353.051		357.001		522.213
997.377		1249.15		346.227		572.854
851.2		898.25		520.417		556.692
960.384		509.643		353.41		821.39
947.813		726.573		325.036		982.292
861.616		675.932		392.199		437.093
1850.01		303.846		357.001		754.228
856.588		592.249		461.875		521.495
570.699		651.15		721.186		1009.95
1660.38		576.805		501.023		467.621
1042.63		901.482		593.685		637.502
354.487		481.269		678.805		542.326
1049.45		631.756		477.319		669.108
1134.93		778.291		474.086		345.867
2303.27		1009.59		405.128		486.297
1245.91		1153.97		464.748		1256.69
745.249		1140.32		413.389		617.389
586.143		419.494		512.875		693.89
1512.77		756.024		566.748		386.093
779.01		656.538		515.03		1037.6
654.742		1087.17		654.023		456.128
312.107		1307.69		571.417		437.093
454.333		633.911		563.157		676.291
1514.56		631.756		393.994		359.156
545.199		1632.01		530.474		1015.33
666.953		711.129		337.248		690.657
573.932		785.115		754.228		657.256
834.32		782.601		506.051		980.496
538.734		344.431		405.128		399.741
935.961		1673.67		374.959		372.445
1053.05		734.474		708.615		717.235
513.234		763.566		396.868		845.454
535.502		309.952		537.657		709.693
834.32		450.382		306.001		326.114
689.939		1050.53		475.164		603.742
442.84		372.086		517.185		578.241
423.804		888.552		526.164		326.114
730.883		882.088		794.453		386.093
1193.84		318.212		449.664		348.741
797.327		331.142		1007.43		601.587
932.369		704.664		406.565		517.185
615.953		358.797		650.432		624.932
671.981		830.01		460.797		474.804
456.488		837.552		1006		302.769
726.932		853.355		485.579		555.615
763.207		2124.77		372.804		364.903
1513.48		1156.48		384.656		541.608
308.874		321.804		453.973		502.819
2449.09		555.615		418.417		798.404
557.77		663.361		484.143		369.931
605.896		728.728		428.832		425.959
529.396		810.256		428.832		580.396
1031.5		1018.93		335.811		522.572
835.038		581.833		405.128		485.579
655.101		395.79		321.086		891.785
720.826		1958.84		303.128		478.396
900.045		1237.65		562.439		730.165
618.108		369.213		307.079		877.419
1306.25		376.396		576.805		413.748
610.925		902.2		438.889		473.727
468.699		734.474		734.115		302.05
798.404		304.564		729.446		494.199
915.13		438.889		698.2		408.361
660.847		1880.9		868.081		523.291
1231.55		737.707		490.967		805.228
1144.63		417.339		548.072		490.967
1118.77		932.01		1322.41		759.974
527.6		1697.37		407.642		520.417
661.207		394.713		576.446		462.234
1074.24		559.206		778.651		429.192
2425.74		520.776		463.311		611.643
726.932		580.396		468.699		645.045
2469.56		1183.78		489.889		397.586
550.586		747.404		405.128		470.854
611.284		305.283		367.776		303.487
568.185		848.327		472.65		402.973
623.495		647.918		538.016		459.361
401.537		450.382		411.952		572.495
354.846		717.594		392.917		396.508
1122		1051.61		670.904		493.84
809.179		651.509		854.792		478.396
603.382		502.1		420.931		560.284
776.855		480.551		619.544		415.544
1247.35		1578.85		332.938		356.642
786.552		847.968		320.367		488.452
455.41		603.742		375.677		379.628
1650.68		856.588		524.727		758.897
858.742		351.973		360.593		359.515
1030.42		740.221		359.156		318.212
932.01		773.622		302.05		718.312
1085.37		515.03		335.452		628.164
694.967		437.452		492.403		529.755
1209.64		774.341		314.262		464.389
1503.07		814.566		695.686		657.615
477.319		606.256		326.832		529.037
706.46		638.939		715.798		470.854
898.25		668.39		613.08		614.875
1176.6		931.651		361.311		483.065
526.523		639.298		426.678		411.593
447.509		663.361		1138.17		395.072
2375.46		767.876		325.755		553.101
1717.84		1334.62		366.339		384.297
1741.19		1019.29		486.297		355.565
1703.12		424.523		461.516		747.763
795.172		387.17		710.77		316.776
1074.95		434.579		362.748		320.008
1111.59		699.277		415.544		336.529
1022.52		545.199		527.6		826.778
609.847		1340.01		534.424		636.066
604.101		749.2		413.748		571.058
625.65		1013.18		1312.72		934.165
819.594		655.819		435.656		484.861
757.82		359.515		559.924		984.806
946.377		514.312		692.812		546.995
573.213		563.875		322.163		1131.34
375.318		300.255		300.614		702.869
1433.75		482.706		1133.5		498.509
1414		459.002		799.841		366.698
1005.64		734.834		800.918		522.213
963.616		456.488		429.91		656.178
642.89		2106.45		404.41		566.03
538.375		944.222		443.917		418.417
701.432		515.03		378.551		682.038
2284.95		300.255		970.799		364.544
1873.36		1753.4		564.953		338.684
667.671		826.778		422.009		390.044
801.996		1332.83		842.94		327.55
802.714		483.783		329.346		842.94
1347.91		333.656		432.065		559.924
1438.78		1344.32		553.46		682.756
959.665		1229.75		360.952		872.75
1403.58		666.953		301.332		336.17
1168.34		379.987		766.798		630.319
677.009		1464.28		481.628		587.22
1116.98		829.651		731.242		597.636
820.672		566.748		405.846		469.417
743.453		1138.53		313.543		420.213
938.116		433.861		495.636		452.537
1285.78		300.255		424.163		600.868
513.234		361.311		645.763		581.833
419.494		1554.07		447.509		349.818
707.538		921.236		312.825		627.087
390.762		1931.9		771.108		434.579
744.531		1196.71		397.227		597.636
711.129		697.84		868.081		440.685
1187.73		428.114		907.229		441.044
658.692		748.841		415.544		451.459
367.058		619.904		314.621		526.523
769.313		501.023		677.369		708.974
890.348		1091.12		485.22		355.205
475.882		866.285		553.46		677.369
2378.33		386.811		462.593		687.784
1193.48		744.531		467.981		880.292
614.875		771.827		593.326		384.656
694.249		566.03		406.206		566.389
907.229		624.932		464.748		773.263
2195.52		803.792		629.96		404.769
615.235		867.003		965.412		328.628
1184.14		875.264		716.876		346.227
847.249		331.501		674.495		531.192
841.503		374.959		352.332		743.094
362.389		1203.17		415.903		312.825
826.778		858.024		448.227		437.811
732.319		1335.34		498.509		374.959
359.156		1248.79		755.665		397.586
424.523		638.221		461.157		577.523
528.678		1225.8		433.502		433.502
556.333		808.461		476.6		461.516
949.609		973.313		334.015		760.693
926.982		658.692		429.192		522.213
1123.08		485.22		329.346		382.501
1419.03		785.475		610.925		335.452
520.776		1007.79		446.072		706.101
784.756		440.325		502.46		372.445
1402.15		1206.05		323.6		622.418
2514.45		1315.23		451.1		412.67
480.192		1245.55		582.551		521.854
413.03		720.826		434.22		973.672
942.067		865.926		402.973		594.044
719.749		488.093		545.917		575.727
1103.69		960.024		382.86		505.333
1058.07		353.41		575.727		522.931
1915.02		408.001		638.58		558.129
513.593		901.482		395.431		469.417
854.792		657.256		314.98		387.889
485.22		679.883		702.51		399.741
432.783		1345.4		689.221		326.473
2105.01		590.812		380.706		339.762
478.755		306.001		730.883		502.1
578.96		646.481		693.531		339.403
1773.51		530.115		569.981		576.446
864.848		540.889		1101.53		312.825
911.179		479.114		531.91		450.382
1347.91		597.636		327.191		647.559
459.361		868.44		562.798		470.854
584.706		849.404		458.283		667.671
3597.67		959.665		652.587		826.059
736.629		614.516		336.529		350.177
540.53		785.115		369.931		573.213
358.797		830.01		416.621		1132.78
665.157		897.531		577.523		839.707
459.72		372.086		541.967		501.741
2521.99		470.135		826.778		461.516
469.058		491.685		333.656		365.262
1273.93		467.981		562.439		369.572
872.75		886.038		418.776		453.614
675.573		603.023		902.56		418.417
1059.87		1260.64		587.22		463.311
601.227		1166.9		634.629		996.299
827.496		901.123		918.722		540.53
661.925		995.581		749.918		427.755
679.524		1476.13		517.185		331.142
1003.84		1036.88		527.96		626.368
1029.34		1215.03		510.72		614.157
772.186		455.769		942.426		516.467
1080.7		581.474		316.776		589.375
548.072		592.249		622.059		971.158
1113.74		814.566		690.298		766.08
318.931		1322.77		450.382		409.797
1045.5		417.339		358.797		666.235
642.53		937.398		895.736		467.621
1279.67		1066.69		361.311		568.544
772.545		754.946		421.29		440.325
1494.09		596.558		556.333		578.601
1880.54		597.277		354.487		754.228
445.713		757.101		600.15		314.98
1123.44		705.024		431.347		562.079
535.502		863.411		358.438		420.213
1251.66		1008.15		389.684		364.903
308.515		460.797		633.192		350.536
325.755		913.334		478.037		331.142
692.453		629.242		523.291		319.649
981.933		671.981		302.769		610.566
446.431		391.48		733.756		680.242
420.213		1153.61		336.17		437.811
813.13		854.792		398.663		457.565
698.559		357.72		706.101		365.98
1083.22		707.538		342.276		554.178
796.608		541.608		355.205		585.065
616.312		693.531		585.425		578.601
1593.94		480.551		335.452		597.277
570.699		1167.62		322.163		549.868
675.214		763.207		391.121		742.017
1134.93		1011.74		334.374		351.973
397.586		1071.72		612.72		501.741
891.067		969.003		555.615		735.911
766.798		563.157		412.67		598.354
363.825		372.086		599.791		499.586
1333.91		487.375		326.114		450.023
356.642		646.84		395.072		630.319
714.003		1481.88		526.882		578.96
898.25		3608.8		561.361		573.572
633.911		613.439		422.727		527.6
714.003		387.53		380.346		392.917
1440.22		1773.87		676.65		703.946
1139.24		813.13		523.65		345.149
675.573		1253.1		318.572		486.297
1400.35		423.804		796.608		860.897
1224		532.269		557.77		577.882
1751.25		942.067		502.819		662.643
959.665		345.508		560.643		724.059
1058.43		353.769		654.742		608.051
582.551		667.312		503.896		487.016
2666.73		669.826		332.938		396.508
552.382		452.537		322.522		308.156
659.411		1284.34		485.579		516.467
1187.37		499.945		534.424		391.48
1326.72		328.987		371.008		446.79
1408.97		570.699		690.657		365.262
987.68		1083.57		1057		366.339
688.143		864.489		504.255		661.925
1128.11		1823.44		766.08		753.151
1197.43		868.081		457.565		825.341
632.474		912.616		447.149		602.305
1912.87		915.489		399.382		338.684
2547.85		396.868		331.142		408.72
1804.04		1318.1		392.558		891.785
785.115		1000.25		480.551		336.889
483.783		804.869		394.353		330.424
1230.83		1254.53		598.713		668.39
816.003		317.494		677.369		529.755
949.968		578.96		323.6		574.65
912.257		785.834		734.474		408.72
2141.65		604.46		519.699		771.108
1669.36		1420.46		935.602		408.72
386.093		880.292		300.255		1106.92
1143.19		509.643		434.938		654.383
806.306		524.009		332.938		413.389
316.776		353.769		342.635		734.115
1375.57		483.783		536.939		845.813
494.558		849.045		572.495		885.679
1665.41		707.538		477.319		445.713
331.142		1468.23		375.677		550.586
314.98		830.01		335.811		476.6
823.904		554.178		609.847		311.748
1523.54		831.806		476.6		388.966
1224.72		806.306		437.811		495.995
745.967		1476.13		451.1		378.551
1108.72		889.271		515.748		340.121
1173		718.312		465.466		640.016
2061.56		491.326		517.185		921.954
877.778		465.826		354.846		335.093
531.91		690.657		340.48		654.383
1314.15		754.587		423.804		351.614
549.15		523.291		525.446		620.981
685.629		475.882		480.91		703.228
711.129		808.82		427.755		591.53
797.327		938.834		375.677		399.382
1190.6		971.877		489.53		436.375
1356.89		885.679		722.263		419.854
403.332		1064.54		654.023		507.847
2048.27		632.833		316.417		727.65
1019.64		390.403		363.107		488.452
2447.65		572.854		891.785		351.973
3047.8		572.854		527.96		357.72
1062.38		396.868		449.664		479.833
1034.01		1037.24		335.093		416.262
968.285		846.172		493.84		369.572
4219.37		554.896		491.326		818.517
666.235		898.25		772.186		571.417
450.741		575.368		387.53		369.572
1643.5		589.375		536.579		585.425
1277.88		355.924		871.313		386.093
635.706		376.396		737.707		437.093
322.522		1425.85		615.235		323.6
504.974		320.367		578.601		494.199
497.072		314.262		515.748		379.269
743.812		658.692		420.572		566.03
891.426		728.01		540.171		899.686
882.447		496.354		343.712		862.334
817.799		935.602		552.382		1203.89
529.037		522.572		381.065		370.649
951.046		1161.15		316.776		1175.88
341.558		730.883		488.093		830.369
769.313		695.326		332.579		517.185
684.911		906.51		652.228		422.368
324.318		853.355		561.72		666.594
499.945		803.073		318.572		321.804
734.834		537.298		558.847		816.721
1126.67		922.313		386.093		656.897
1647.81		559.206		455.41		314.98
962.179		747.045		301.332		782.242
390.762		552.023		386.093		426.318
636.425		490.607		604.101		687.066
928.06		1402.15		907.229		358.797
473.009		653.305		789.066		642.89
711.129		706.46		654.023		660.847
1112.31		832.524		754.587		388.248
2277.41		1445.96		419.494		385.015
312.466		369.213		537.298		341.917
955.715		831.087		355.565		735.911
709.693		964.694		716.876		387.17
1028.98		465.826		692.094		663.361
301.691		346.945		644.326		306.001
837.552		651.15		861.257		410.156
1130.26		651.15		669.826		488.812
2407.06		946.377		610.206		343.712
1139.24		334.734		761.052		474.445
1753.76		840.785		786.193		333.656
509.283		346.945		426.678		362.029
383.938		752.791		727.291		509.283
923.031		952.482		724.418		1063.82
581.115		729.446		886.038		368.494
413.748		356.283		610.925		351.614
1288.29		731.601		478.037		320.367
808.101		1193.12		517.903		377.832
1011.38		972.236		753.869		318.931
1291.17		1283.98		580.396		578.96
897.89		579.678		378.191		556.692
466.903		1225.08		332.579		403.692
1156.48		629.96		866.285		377.473
692.094		716.876		402.973		360.234
856.228		326.114		643.967		478.396
807.742		402.973		576.087		433.142
418.417		2065.87		454.692		405.846
491.326		515.389		547.354		645.763
1207.84		502.819		949.609		564.953
543.762		987.68		509.643		375.318
1049.81		1407.17		535.861		623.854
1036.17		837.911		393.994		602.305
641.812		320.726		323.6		793.017
318.931		1244.84		961.82		393.276
688.143		1002.4		404.051		407.642
736.27		529.396		406.924		490.248
892.862		953.201		425.6		745.967
1164.74		385.734		316.417		410.875
666.953		596.558		527.241		475.882
759.615		418.776		584.706		956.074
664.798		941.708		509.643		457.206
1300.86		1365.87		396.149		684.552
2050.42		1068.49		424.523		468.34
507.847		1314.51		483.065		579.678
1286.5		314.621		378.551		308.515
1240.88		581.833		629.242		564.594
327.55		430.269		546.636		377.832
965.053		396.868		473.368		481.988
549.509		612.361		875.264		543.403
1273.21		618.108		438.53		495.995
2456.27		3048.16		306.719		441.762
2110.4		456.488		471.213		427.037
752.432		634.27		549.868		307.438
309.593		418.417		498.15		354.846
1660.38		640.735		592.608		680.601
307.079		516.826		535.143		300.973
2148.47		616.312		904.714		336.17
3079.41		515.389		562.798		517.185
672.7		919.081		1045.14		426.318
311.029		436.734		434.579		549.509
1166.9		956.792		350.536		541.967
1651.04		410.156		563.157		910.82
896.813		692.453		379.987		467.621
750.277		961.461		741.298		521.854
1596.81		543.044		476.959		487.375
596.199		487.734		934.884		453.255
884.602		736.989		561.361		577.164
906.869		914.412		382.142		426.318
652.946		809.538		337.607		452.896
345.867		767.158		708.256		367.058
415.185		840.785		495.636		434.938
1046.22		531.551		549.15		613.798
1047.66		596.199		519.699		1117.33
1593.22		685.629		418.776		563.516
445.713		411.593		493.84		418.058
2758.68		377.832		550.586		592.608
460.797		396.508		413.03		358.438
1448.84		719.749		323.959		752.073
1424.77		594.044		303.128		698.2
877.059		1623.03		1009.95		660.488
987.32		557.41		504.255		734.834
1016.77		1018.57		1020.72		1281.11
1459.97		570.34		512.516		420.572
673.777		808.101		670.545		499.945
1291.53		1020.36		428.473		364.544
1183.78		733.397		384.297
1303.38		1075.67		545.199
1202.81		702.15		337.248
1213.23		1201.38		319.29
526.164		467.621		682.038
697.84		316.417		544.122
1393.89		988.398		635.706
557.77		507.847		492.762
479.114		939.912		319.649
767.158		789.784		920.517
1008.87		736.989		592.608
666.235		898.609		510.361
1253.46		694.967		582.551
398.663		819.954		535.502
480.192		949.25		643.967
965.053		769.672		520.417
1215.03		759.256		867.721
589.016		388.248		385.734
833.242		309.593		502.819
384.656		1058.43		437.093
3951.08		405.487		420.213
747.045		312.466		862.334
1506.66		828.932		391.839
318.212		476.6		482.706
1529.65		440.325		541.608
1185.57		572.495		540.53
944.581		714.003		507.488
607.333		757.82		784.397
754.587		827.137		305.283
1106.2		393.635		605.537
573.572		302.769		955.715
785.834		1118.41		369.213
1601.12		422.368		692.094
486.297		494.917		384.656
952.482		696.763		464.03
671.263		618.467		517.903
838.63		513.234		483.065
737.348		630.319		465.107
311.029		1602.2		820.313
989.834		1007.43		377.114
990.553		680.242		579.678
526.523		786.552		560.643
745.967		1197.43		638.58
1076.75		372.086		431.706
894.299		462.593		692.453
467.981		840.785		515.03
780.087		482.347		452.896
1345.04		605.896		394.713
1582.8		631.397		357.72
1413.64		746.686		320.367
867.362		511.079		450.741
797.327		768.594		527.241
513.234		2241.85		616.671
399.741		1113.03		632.833
321.804		447.149		318.212
305.642		742.735		714.362
508.924		695.326		339.762
396.149		952.482		534.065
784.397		734.834		754.228
1044.43		646.84		508.206
671.981		895.736		837.911
1111.59		735.911		1130.62
986.961		1087.17		324.318
663.361		397.227		425.6
1225.08		1078.91		319.649
660.129		506.051		320.008
831.447		941.708		369.931
790.862		790.503		455.41
800.918		706.46		483.424
598.713		1183.78		361.67
871.313		466.185		321.804
1494.81		1261		402.255
1016.77		661.566		465.466
1069.57		915.848		468.699
675.932		949.968		366.698
462.952		946.736		313.903
400.459		525.446		383.938
632.474		885.32		383.579
414.825		340.121		522.572
769.672		937.398		394.713
857.306		719.39		492.044
1224.72		738.425		497.431
594.763		560.643		546.277
831.806		444.995		622.777
524.368		430.628		351.614
1210.72		604.46		458.283
931.292		459.361		867.003
1160.43		438.171		450.023
1206.76		357.72		547.354
893.581		604.101		451.818
1133.86		1081.42		615.953
1378.8		780.087		549.15
465.826		762.129		828.932
1056.64		555.255		464.03
557.051		642.89		506.41
813.489		622.418		926.264
1167.62		308.156		453.973
719.749		420.931		821.39
910.82		1013.54		901.841
1589.27		480.551		564.594
1975		603.023		460.797
708.974		523.291		642.53
1100.1		831.447		620.981
598.713		1119.49		837.552
1170.13		522.213		734.474
1256.33		1375.93		448.586
844.735		618.108		311.388
1044.07		559.565		444.635
867.721		342.276		323.241
561.361		772.186		455.051
998.813		787.989		423.445
1579.21		878.855		385.375
893.581		307.797		364.544
601.227		557.41		347.663
692.812		552.741		599.432
1181.98		923.391		362.029
937.038		536.939		422.368
934.884		518.981		598.354
452.178		313.903		480.192
447.149		528.319		386.452
622.059		762.848		462.234
856.947		526.523		717.953
427.396		1002.76		517.903
608.77		647.199		735.193
1066.69		466.903		461.516
552.382		688.502		787.27
740.58		492.403		341.917
865.207		1372.69		907.588
314.262		471.931		338.325
305.283		1010.67		706.819
748.481		930.574		459.72
1083.57		1110.87		746.327
1146.43		800.559		707.179
1608.66		316.417		625.291
1968.54		820.313		424.523
1042.27		707.538		480.192
427.755		767.517		780.806
614.516		652.946		1167.62
1851.09		962.539		562.798
638.939		594.044		578.601
1292.24		647.559		697.481
897.172		610.925		476.6
901.841		454.692		816.721
646.122		644.685		591.171
1568.79		312.825		366.339
1257.76		688.143		572.495
2247.6		371.008		333.656
504.255		626.009		443.558
526.164		680.601		425.241
947.454		461.875		313.543
1190.24		318.931		330.783
645.404		571.417		389.684
1217.9		369.213		627.805
1315.95		358.438		383.22
1034.37		573.932		428.114
1808.71		1091.12		796.968
634.27		495.276		588.657
383.938		312.107		678.446
831.087		680.601		551.664
1173		696.045		358.797
427.755		838.63		308.874
2212.04		618.467		459.361
1782.49		2631.18		426.318
1174.8		623.495		404.051
1643.14		987.32		306.719
754.946		900.764		565.671
1410.41		436.734		564.953
1321.34		494.199		451.1
396.868		560.643		472.65
1202.1		930.215		528.319
856.228		1065.62		420.572
699.995		757.101		541.248
417.699		796.968		666.953
705.742		586.502		363.825
428.832		1834.57		560.284
761.411		1178.39		467.981
840.785		1165.46		359.875
1398.55		1504.15		506.769
512.157		675.214		407.283
371.727		1029.7		408.72
327.91		701.432		351.614
1016.77		1081.78		825.341
3233.84		564.234		523.291
2572.64		658.692		929.855
687.425		648.277		581.115
522.572		1700.6		318.572
995.222		1021.08		416.262
796.249		676.65		458.642
659.052		577.164		307.079
943.862		596.558		987.68
1088.96		482.706		450.023
609.847		492.762		540.53
2151.35		1702.4		365.621
821.031		1125.6		377.832
719.39		845.454		666.594
773.622		689.221		372.445
1484.75		661.925		744.172
856.228		740.939		440.685
916.567		976.546		758.897
824.623		990.912		443.199
1862.22		781.524		683.474
677.369		379.269		354.487
395.072		1071		452.896
459.361		854.073		466.903
1096.5		620.263		313.903
1104.41		645.404		327.55
817.439		825.7		665.876
958.229		539.453		807.742
400.1		350.177		461.157
668.39		1298.35		920.876
1121.64		1073.16		728.01
744.531		962.179		460.438
685.27		322.881		563.516
603.742		646.84		625.65
481.269		711.488		683.115
497.072		872.75
538.016		994.144
797.327		760.334
926.623		710.411
1215.74		336.889
1358.33		550.227
778.651		1575.98
687.425		681.319
1094.35		358.797
1306.25		694.608
420.213		686.707
1512.41		877.419
787.63		861.975
1809.79		1563.05
719.39		703.946
1272.49		669.108
483.424		1491.58
692.453		634.988
		1273.21
		1258.12
		969.003
		1365.15
		1081.42
		1559.46
		1234.78
		468.699
		540.53
		448.227
		534.784
		450.741
		448.586
		580.396
		718.312
		991.63
		899.327
		1213.59
		548.072
		1048.74
		317.853
		1004.92
		489.889
		1121.29
		863.411
		325.396
		640.016
		409.438
		794.453
		351.614
		319.649
		648.636
		1053.05
		668.031
		671.981
		549.868
		530.833
		726.932
		464.389
		452.537
		464.03
		790.862
		553.101
		455.41
		730.524
		524.009
		1013.9
		1192.04
		758.897
		982.651
		1110.87
		756.742
		421.649
		662.284
		618.467
		859.102
		944.581
		596.199
		602.664
		362.389
		620.622
		1055.56
		905.792
		1059.87
		646.481
		1184.5
		1036.52
		443.199
		928.778
		947.454
		900.405
		369.931
		895.376
		477.319
		678.805
		1097.22
		477.319
		835.038
		1073.16
		1203.53
		1215.38
		1445.6
		980.137
		1325.29
		1020.72
		909.383
		610.925
		363.466
		454.692
		592.249
		633.192
		311.388
		723.341
		1291.88
		698.559
		601.587
		443.558
		567.826
		868.081
		1059.15
		324.677
		405.487
		1013.9
		1941.24
		400.459
		387.889
		1216.82
		723.7
		464.389
		652.228
		599.791
		1123.8
		1122
		714.003
		669.467
		498.868
		870.595
		740.939
		1155.05
		714.721
		1437.34
		892.862
		685.988
		670.904
		1041.19
		1015.33
		649.354
		592.967
		671.622
		595.84
		813.489
		591.889
		2299.32
		677.009
		758.179
		442.121
		1217.18
		687.425
		900.405
		708.974
		753.151
		892.862
		1112.31
		1179.11
		981.933
		1298.71

## Sheet: L
shScr		shRala		shRalb
876.761		280.335		268.892
1387.01		290.704		261.026
1618		516.331		253.517
552.088		255.305		396.902
532.064		795.593		267.82
942.911		375.091		539.215
420.502		689.394		359.358
1412.04		414.066		347.2
744.102		841.361		337.546
474.853		430.156		477.713
683.673		417.999		303.934
469.131		719.788		478.428
536.712		449.108		388.678
719.43		835.998		282.48
627.177		263.171		807.392
638.619		452.326		680.098
275.686		556.378		598.572
537.785		641.122		348.988
511.682		3935.77		341.121
574.972		299.643		344.697
655.425		302.504		313.231
331.467		435.52		393.327
411.92		574.257		342.552
865.676		420.144		368.654
332.54		392.969		625.747
1087.37		423.362		428.011
370.085		782.72		572.469
681.528		510.967		271.753
800.956		583.196		1237.19
541.36		357.57		2348.16
710.849		526.7		765.199
938.978		749.466		856.022
431.587		515.973		542.791
1041.24		635.044		2171.52
429.084		710.133		1212.52
517.403		545.651		343.624
1033.02		596.426		1285.11
624.317		596.784		937.19
628.965		446.247		907.154
315.019		1388.44		258.523
694.043		1282.24		2571.64
677.952		400.478		484.507
799.526		420.86		742.672
923.602		562.1		510.609
624.317		296.425		335.4
609.656		330.394		338.261
360.43		443.386		385.46
306.437		669.013		568.178
443.029		328.964		2342.08
631.468		402.981		251.371
634.686		464.841		357.57
273.183		546.724		370.8
862.1		380.812		552.803
488.083		276.759		598.214
340.764		640.765		294.995
803.817		1103.1		567.821
910.015		491.658		1428.49
720.86		1289.04		1911.57
288.916		627.535		1711.69
312.873		2022.06		3136.24
958.287		439.453		292.85
632.898		351.133		251.371
640.05		404.411		543.506
659.716		349.703		1146.73
763.769		700.837		300.001
566.748		631.468		475.21
687.249		670.086		664.007
855.664		392.969		318.595
415.138		589.275		405.126
693.328		493.446		1615.14
311.801		287.844		971.874
1105.61		447.677		416.569
431.587		964.723		409.775
593.208		973.662		307.51
790.587		335.4		594.281
275.686		316.807		1285.82
274.971		390.824		264.959
750.181		553.518		577.475
561.027		324.316		287.844
1164.25		359		1757.45
295.353		699.406		561.384
530.276		346.127		1527.9
659.716		1788.56		695.831
1382.72		1613.71		687.606
512.755		318.952		653.637
842.792		373.303		841.719
306.795		851.731		615.02
715.139		561.742		504.531
750.539		408.702		758.405
498.81		431.587		774.496
435.877		459.477		806.32
427.653		335.758		1620.86
965.438		716.57		342.552
819.907		323.243		1323.72
369.369		562.457		1175.33
276.044		413.708		426.581
776.999		483.077		1061.27
401.551		392.612		921.457
727.297		424.435		328.249
830.634		482.004		793.09
825.271		448.035		2722.54
721.576		633.971		1671.28
527.058		623.959		1671.28
724.794		709.776		335.4
613.947		997.619		2098.58
631.468		648.274		504.531
662.934		371.515		441.241
662.577		464.483		1683.44
534.567		635.044		1744.58
453.398		766.987		902.506
486.652		251.014		555.663
585.342		508.464		2144.35
605.365		262.099		1501.44
328.964		329.679		1056.98
294.995		1087.37		617.88
544.936		680.813		3397.98
458.762		602.862		1222.53
613.59		439.096		829.562
860.67		477.356		693.685
538.857		283.195		562.457
379.024		250.656		675.807
331.467		458.047		350.061
531.349		333.613		880.694
804.532		744.102		1242.2
277.832		458.762		571.039
508.822		527.415		297.498
653.995		1688.09		475.568
432.302		287.844		274.256
1172.11		477.713		357.57
538.5		541.36		730.157
542.791		562.815		1045.18
563.172		301.431		1649.11
288.559		502.028		1239.69
303.934		504.531		420.144
799.168		377.594		1030.87
336.115		336.115		1375.21
690.825		325.388		1776.41
277.832		288.916		1780.34
983.317		326.104		733.733
467.701		333.97		2382.13
608.941		337.546		2084.27
277.832		310.728		2128.61
370.085		433.732		549.227
351.133		344.34		1550.06
590.348		328.964		268.177
574.972		636.832		342.909
348.988		450.538		1021.93
748.751		382.957		2299.89
934.33		773.781		693.328
377.951		663.292		1687.37
619.311		531.349		290.704
502.028		678.667		3250.67
713.709		1420.98		908.227
958.287		736.951		453.398
956.141		1153.16		770.563
268.177		1207.87		263.529
461.98		2383.92		417.284
1216.45		433.017		450.18
741.6		710.849		671.873
280.335		1067.35		1327.3
398.69		807.392		782.362
290.347		694.4		549.585
333.613		575.33		397.617
603.935		416.926		1465.32
690.825		350.418		2585.59
345.77		1203.22		1046.96
477.713		1260.08		740.527
258.88		1170.33		504.531
504.531		297.498		536.712
795.235		1212.16		545.651
719.43		1729.21		765.199
517.046		598.929		573.899
521.694		374.733		524.555
734.091		1327.66		453.041
298.213		1446.37		1055.9
1177.83		1715.62		300.001
319.31		891.421		1166.75
1068.78		1258.65		1084.87
525.27		983.674		936.117
696.903		1650.18		799.168
611.444		1049.82		893.209
648.631		860.67		993.329
289.631		1526.46		656.14
917.881		2137.55		507.391
709.061		815.974		1181.77
794.877		253.159		504.173
433.732		376.521		1578.67
660.074		498.095		680.455
464.125		401.551		1189.99
642.553		424.078		417.641
414.781		2475.1		381.884
343.982		397.617		352.564
456.974		861.743		746.248
408.345		745.533		905.724
779.502		379.739		2797.27
347.558		543.863		1369.85
395.114		375.448		1570.09
1082.72		2388.21		498.095
846.725		2079.63		1984.15
461.265		837.428		1020.15
473.065		1166.75		1104.53
336.473		285.341		426.938
1125.27		1049.82		390.109
849.943		1061.62		657.928
545.651		503.101		385.818
1013.71		651.134		273.898
522.767		865.319		2331
610.729		1624.8		846.01
636.474		819.55		2036
394.757		1595.12		773.066
853.519		1439.93		3225.28
578.19		804.889		1045.53
633.613		1015.14		479.501
654.71		569.251		689.752
982.959		614.662		984.747
623.244		1598.69		547.797
519.549		608.941		1210.02
947.917		1877.6		260.668
388.321		751.611		591.063
367.582		1543.63		831.349
775.926		851.373		296.783
427.296		482.719		298.571
304.649		508.107		2424.68
561.027		866.391		1063.05
578.19		271.038		478.428
484.507		373.66		2342.44
875.331		641.838		718
504.888		3623.25		304.292
1031.23		720.145		769.132
589.275		681.885		777.356
397.26		1080.22		1829.33
1307.63		596.784		948.632
755.187		904.651		2285.59
417.284		2920.27		634.686
1074.85		728.727		381.169
488.083		381.884		705.843
827.416		330.394		827.416
865.319		931.827		1210.02
257.093		1136.36		950.778
403.339		2761.87		1272.59
529.203		912.518		1670.92
719.43		449.465		749.108
628.965		1945.54		274.971
771.278		945.057		483.434
353.994		813.113		1413.12
1350.54		508.107		365.794
326.104		840.289		943.626
1226.46		2027.78		1159.6
1331.59		708.346		969.729
892.494		1087.73		902.506
403.696		264.959		448.75
405.126		1059.48		480.574
627.892		313.231		1688.44
646.844		851.731		2446.85
748.393		437.308		595.354
442.314		744.102		496.307
420.502		371.157		2693.21
711.564		622.171		928.966
900.003		1862.22		1610.14
525.985		328.607		780.932
1016.57		402.623		288.559
758.048		396.545		901.076
499.167		467.701		491.658
318.595		1269.37		1236.48
868.179		693.328		1483.2
1265.8		1206.08		621.456
1077.71		437.308		4699.9
1312.28		1230.75		1546.13
1868.3		507.034		599.287
1442.44		605.008		1730.99
1061.62		758.405		1398.1
901.433		332.897		402.623
275.686		803.459		436.95
976.523		948.99		1945.18
1375.93		600.002		721.218
367.582		1296.55		272.111
2213.36		527.773		1809.3
1173.19		910.73		281.765
616.093		458.404		280.692
795.235		1509.66		395.472
943.626		1766.39		804.532
696.903		839.931		541.36
2248.4		485.937		1608.35
701.909		1592.97		327.891
384.745		778.072		649.347
770.563		291.062		1893.69
842.077		1024.44		323.601
479.501		473.78		494.161
1261.15		1208.59		1193.57
1194.64		752.684		1522.17
1988.8		728.012		495.949
898.93		623.959		561.384
1482.13		1619.08		1354.47
331.467		1798.58		731.945
779.502		805.604		559.954
1665.56		771.635		1153.88
1428.85		1211.8		684.031
401.551		1106.32		1571.52
363.291		402.981		680.813
1123.13		778.787		1714.9
1257.57		1115.62		1567.94
569.608		744.818		2927.07
682.243		1038.02		475.21
1178.19		481.646		442.314
644.698		1198.22		2110.38
768.06		1209.3		988.323
1179.62		1480.7		1189.99
717.642		739.812		1318
1301.91		776.999		435.162
1405.96		1712.04		1290.11
1052.69		738.739		526.7
1275.81		699.406		1170.68
1296.19		497.022		2213.71
1111.33		404.769		1438.15
944.342		598.929		662.934
899.645		548.869		764.484
1233.62		300.716		1598.34
1460.67		2065.32		1803.22
1609.78		1338.74		283.553
976.523		749.824		1404.53
790.587		1344.82		1292.26
1059.84		690.825		1711.69
1174.62		634.329		496.664
1333.73		1543.99		517.046
1366.27		436.593		440.883
1286.18		579.62		1809.3
1194.28		1902.63		634.686
665.08		1104.89		1002.98
1824.32		707.63		1329.8
856.379		699.049		1315.86
1689.87		2726.11		550.657
402.266		1783.56		981.171
950.063		748.751		367.224
265.674		367.582		871.755
1455.31		473.422		760.193
946.844		1164.6		1757.45
1610.85		941.839		936.475
725.151		1025.87		1381.29
1935.17		697.261		490.943
539.215		412.635		510.967
1820.39		715.139		2060.67
685.461		1432.78		487.367
1368.06		346.127		440.168
631.826		1050.54		334.685
1580.82		449.108		1830.76
843.149		410.848		696.903
881.052		1275.45		872.47
1587.61		302.862		542.433
1087.73		1528.25		2676.05
544.579		626.82		721.933
376.878		366.509		529.203
355.424		407.272		562.1
861.028		910.015		878.549
1010.13		1484.99		986.177
596.426		613.947		687.249
804.174		1122.05		655.425
910.73		853.161		414.066
428.726		830.634		472.707
1128.49		743.745		843.864
1018		884.985		1897.26
847.44		2400.01		1204.65
294.637		447.32		277.474
955.426		828.489		900.003
304.292		1322.29		451.968
1404.18		1016.57		1058.41
261.026		815.616		707.988
2140.41		597.141		698.334
922.887		1015.86		554.948
1173.19		1594.05		1935.17
1408.11		1314.78		367.939
1456.38		2390.35		1341.24
3204.9		401.551		367.224
626.82		2089.99		536.355
912.875		814.186		1531.83
558.524		2427.9		1102.39
473.065		1273.66		534.567
1185.7		487.725		1463.18
914.306		332.182		1390.23
657.213		1638.74		545.651
1362.7		592.851		456.616
1052.33		1226.11		971.517
508.107		513.112		1284.75
331.825		567.463		1210.02
470.562		691.182		764.484
1018.72		1530.04		494.161
1202.15		921.099		1057.33
533.136		474.495		595.354
2474.02		656.498		254.947
1569.73		1193.57		892.136
1782.84		1314.43		857.095
606.438		833.495		649.704
1774.98		744.46		2270.92
729.442		1672.71		2657.46
1014.78		604.65		488.44
1115.97		867.822		253.159
1694.17		868.894		510.609
984.032		327.176		1165.68
1730.99		810.61		1379.5
525.27		1252.92		1432.07
370.442		1692.38		338.261
2289.16		1195.71		1017.29
1179.26		576.76		1349.47
525.627		1626.23		1230.04
929.681		907.512		886.773
2409.3		758.763		833.137
1905.13		574.257		1624.08
364.006		985.82		428.368
774.853		406.914		1302.27
827.774		598.572		313.946
2480.1		361.503		546.724
1697.38		1191.42		1554.71
761.266		1317.29		2261.27
914.663		389.393		590.705
623.602		430.514		1043.75
2669.26		1056.26		282.122
757.69		1226.82		844.58
1586.54		1642.32		562.815
1521.82		681.885		1044.46
479.859		1092.73		559.954
1493.21		271.038		307.51
1087.73		318.595		880.337
670.801		436.235		1433.14
551.73		473.422		1925.87
1225.03		1352.33		597.499
378.309		1802.87		1552.57
1297.62		928.251		720.503
359		930.754		714.782
926.821		492.731		1293.33
569.608		669.37		476.283
750.181		1851.85		1497.14
688.322		702.982		2734.69
1387.01		422.647		755.187
632.541		1401.67		575.33
2960.32		789.871		1019.79
1797.5		583.554		299.286
421.217		994.759		871.04
391.539		808.465		1789.99
733.733		378.666		975.808
1789.28		720.86		1584.03
864.961		510.252		566.39
1002.98		532.421		416.569
2393.57		1836.12		1798.58
479.859		1089.51		517.403
322.528		620.026		368.654
1285.11		835.64		315.019
963.65		386.533		3470.57
883.555		1155.67		346.485
763.411		1078.07		2524.08
799.883		536.712		1473.54
799.168		748.751		1652.69
735.878		1839.34		785.581
1263.65		968.299		1230.04
854.949		1538.26		512.397
1983.08		1970.21		1702.75
1168.18		429.084		455.901
1004.77		790.944		1021.93
1023.01		601.79		989.753
1232.9		1026.22		843.149
911.088		1935.88		1712.4
1267.23		387.606		1533.26
818.119		930.396		538.5
825.986		1416.33		369.369
1081.65		458.762		328.607
333.97		1123.84		1339.46
934.33		910.372		272.468
490.586		613.59		1141.72
644.698		309.655		1205.72
926.105		352.206		780.217
436.235		562.815
1895.83		1837.91
1155.31		994.759
597.499		1094.16
1217.17		974.735
965.796		389.036
1202.15		763.054
795.235		444.102
318.952		283.91
1136.71		471.992
861.028		1608.71
495.949		3147.69
1141.72		808.823
612.159		841.719
1116.33		1200.72
591.063		1214.31
1083.79		495.949
1085.94		733.018
1918.72		2953.53
699.406		915.021
329.679		1234.33
1821.46		920.384
2054.24		1301.55
732.66		1446.73
1096.31		498.452
780.217		1063.05
343.624		741.957
558.881		996.547
1362.7		527.058
1035.88		835.998
960.432		656.855
546.366		656.855
587.129		2034.93
1038.02		1115.26
567.106		510.967
2118.24		1007.63
390.466		863.173
1126.7		1013.71
505.246		331.825
912.518		991.898
292.492		541.718
465.198		1725.27
1136.36		1375.21
773.066		592.135
523.84		1611.92
2100.01		1109.54
475.925		1964.85
741.6		730.157
401.551		723.363
759.12		1437.79
754.114		1506.8
837.071		485.937
1360.55		497.379
1019.07		800.956
674.376		2433.26
1363.06		274.971
962.22		519.191
852.804		385.103
506.676		1134.93
1576.17		375.448
1578.67		270.323
726.582		388.321
643.625		918.954
860.67		584.626
1389.52		356.497
258.165		1495.71
692.612		1305.49
280.692		789.156
734.448		841.361
731.23		1363.06
733.018		764.484
676.879		376.878
724.436		1157.1
1486.42		1668.78
650.062		445.174
805.247		1184.27
1045.89		2291.66
1128.49		757.333
713.709		1014.78
1263.65		2112.88
625.032		809.538
1428.13		2230.88
600.002		542.076
994.759		399.405
1496.07		757.333
508.822		878.906
371.157		461.98
902.863		1472.11
480.931		1015.14
880.694		528.488
551.372		1026.58
874.615		1025.87
977.238		911.088
692.612		601.432
1653.4		1576.88
715.139		524.555
587.487		919.669
519.191		724.079
521.337		748.393
728.727		838.858
1276.17		1587.97
471.992		2648.16
861.385		849.943
593.208		704.77
878.191		1539.7
1216.81		967.226
1047.68		923.96
614.662		1074.85
665.437		1199.65
435.877		1205.37
983.317		1026.94
1241.48		1102.39
1039.81		392.969
1707.75		1321.22
371.872		1420.27
1800.72		282.838
1614.07		348.273
570.681		354.352
1325.15		1208.23
500.598		549.227
1245.77		842.077
671.873		489.155
646.844		531.349
856.379		949.347
683.673		2160.44
904.294		274.256
395.83		949.347
1384.87		446.605
1805.01		606.796
439.811		421.575
824.556		1584.75
1372.71		1195.71
780.217		468.774
1206.08		423.362
347.915		401.551
2025.99		1497.86
1124.91		869.967
819.907		327.891
997.977		787.368
776.999		1363.06
1882.6		2394.29
1629.8		955.784
411.205		949.347
602.147		646.486
394.757		763.769
1106.68		1360.55
814.901		526.343
757.69		416.211
997.262		1130.28
1268.3		799.168
1420.27		510.967
591.063		1865.44
779.859		413.351
550.3		546.366
1092.02		478.428
753.399		580.693
547.797		835.283
1044.46		1235.05
933.614		302.862
381.527		1382.01
2649.59		475.21
1605.85		1293.69
529.203		1887.97
1486.77		1250.06
2125.39		2901.32
609.656		540.645
488.798		797.023
1188.56		782.362
485.58		512.397
880.337		702.982
894.997		839.931
1177.12		404.411
482.004		925.39
854.234		942.911
848.87		1405.25
975.092		530.276
1141.72		514.9
587.487		583.911
475.568		1099.88
485.937		1453.88
1370.56		735.163
390.466		365.794
637.189		1551.85
965.081		511.325
1072.71		667.225
760.193		446.962
1159.6		1523.25
900.718		328.249
716.927		377.594
718.357		345.055
612.874		372.588
613.59		257.093
449.465		1254.71
1110.97		1216.45
1758.17		372.23
1152.45		717.642
452.683		1468.9
352.206		345.412
949.347		487.725
1097.38		552.445
787.368		1014.78
815.974		680.455
1172.47		308.94
945.414		540.288
2323.49		336.473
617.165		665.437
1052.69		1653.04
1516.1		1139.93
710.491		1287.61
700.479		349.703
2068.54		640.765
1187.85		653.28
1314.78		550.3
1016.21		1087.01
989.038		1187.85
1191.78		4009.79
266.032		617.88
946.487		1022.65
686.534		2127.9
769.49		620.741
321.813		726.582
1236.12		465.198
308.583		424.435
743.03		565.318
1553.64		380.097
935.402		510.609
812.756		582.839
601.075		1143.51
911.445		1572.23
2565.92		304.292
1715.26		450.18
1067.35		1232.19
1112.4		386.175
1409.54		1400.6
310.013		1081.29
467.344		526.343
1000.84		255.305
825.986		341.837
490.586		1226.82
893.209		564.603
813.113		634.686
365.436		616.45
809.538		1317.29
1197.5		1228.97
543.506		430.156
1389.52		356.855
706.915		390.824
676.879		1159.6
1083.44		610.729
1099.88		374.733
559.597		1393.09
1259.36		384.387
765.914		861.743
1784.99		534.567
1147.44		796.308
1010.85		1827.18
603.935		594.638
1252.92		854.592
1670.57		1178.91
1102.74		554.948
494.519		522.409
472.35		795.95
374.375		943.269
356.855		402.266
1171.76		410.49
321.813		1120.62
799.526		793.805
1320.86		818.119
1796.07		1015.5
638.619		289.631
813.829		317.879
500.24		2465.09
992.613		750.181
829.204		920.742
1168.18		419.787
873.9		259.238
933.614		585.342
927.893		2062.1
1195.71		614.305
477.356		395.472
600.002		3381.54
1007.99		729.8
864.246		369.012
943.269		1225.39
1073.07		363.291
1443.15		762.339
808.465		405.842
952.566		864.961
897.857		2637.08
2082.49		456.259
331.467		509.894
867.464		707.988
1286.18		1062.34
797.38		1389.87
573.542		2272
384.745		1149.23
1149.23		288.201
488.44		283.553
279.977		397.975
728.012		326.461
589.275		1474.62
1416.33		1381.65
721.218		460.192
1566.51		596.069
1896.55		544.579
1177.83		1478.55
2372.83		1126.7
617.88		1194.64
1302.27		1545.42
785.581		708.346
1003.7		564.245
979.741		2113.95
978.668		264.959
2068.18		1021.22
662.219		371.515
768.775		353.636
1659.48		714.067
524.197		991.898
1351.61		857.095
675.449		535.282
897.5		660.074
477.713		456.259
1093.09		2774.03
1035.16		456.974
1060.55		640.765
1123.84		817.762
605.723		564.245
425.865		808.823
731.945		1138.14
1763.89		285.341
548.154		789.156
1225.75		1356.98
1005.49		508.822
1799.29		1088.44
375.806		617.88
1170.68		369.012
2540.89		1270.8
1190.35		461.622
1116.33		1736.72
730.157		449.108
2012.76		1336.6
871.755		1746.37
2160.79		801.671
493.089		513.828
433.374		973.662
854.949		291.419
887.13		1035.52
856.737		272.826
937.548		706.915
844.937		556.378
783.793		739.454
446.247		537.07
792.732		946.129
1510.02		769.132
834.21		439.811
1041.6		849.228
488.44		1557.22
861.743		759.478
1241.12		831.349
1139.93		783.435
675.092		790.587
507.034		1309.78
1286.54		314.304
471.277		747.678
871.755		1065.92
1090.23		819.192
448.035		366.151
640.05		528.488
1589.04		1053.04
556.021		6057.59
445.174		789.871
631.11		1305.49
873.543		1937.67
525.27		557.451
434.447		561.027
1317.29		712.636
689.037		882.124
599.644		1287.61
1191.42		1520.39
609.299		1591.19
1137.43		572.827
882.124		511.325
534.924		811.683
642.91		959.002
716.57		326.461
2461.51		684.746
1150.3		441.956
985.462		1158.17
1702.03		1344.82
1518.24		856.737
432.302		1363.77
1734.57		1665.2
854.234		726.224
784.865		784.865
530.991		643.268
1438.86		797.38
379.381		413.708
640.407		650.777
666.152		426.223
909.3		484.864
2083.2		525.27
530.633		1437.43
595.354		1240.41
1320.15		606.796
424.435		356.139
814.544		1343.03
484.149		359.715
584.626		1679.86
352.564		1111.68
582.481		287.128
1075.21		307.867
1010.85		1551.14
757.69		6735.54
686.534		2306.32
1635.88		872.47
454.471		1178.19
399.048		1104.89
371.515		846.367
1129.21		1075.93
428.726		253.517
319.31		430.156
1142.79		795.235
1178.19		808.823
759.12		1493.57
569.608		615.02
830.992		612.874
1360.91		816.332
439.096		613.947
1160.31		817.404
1831.11		1025.15
711.921		1923.37
1021.22		446.962
958.287		801.671
2283.44		1553.64
736.236		2051.02
1375.57		1427.78
1131.71		280.692
1326.58		624.674
423.72		1272.23
847.083		314.304
898.573		611.444
1751.38		1082.36
1270.09		633.971
5380.71		564.96
555.663		1137.43
983.674		1166.39
1145.3		1130.64
795.235		1269.01
1372.71		4386.66
689.037		999.765
3324.68		829.919
521.694		503.101
654.71		1053.04
298.928		965.081
1261.86		1156.02
626.82		1001.91
722.291		2594.53
552.445		361.503
1394.16		1224.68
619.311		1624.44
876.046		1960.91
1098.45		1326.94
894.282		1496.07
1083.79		1551.49
1219.31		894.997
1171.04		690.109
1344.82		1930.16
824.556		675.449
585.699		367.939
1036.59		1262.94
296.425		541.718
1324.44		294.637
434.09		2023.84
477.713		1155.31
1358.76		504.173
674.376		419.072
1119.19		661.861
2505.85		813.471
666.51		987.965
1518.24		674.376
1496.07		626.462
1897.98		1657.34
446.247		1167.82
1027.3		317.164
869.609		1688.8
372.588		347.558
944.699		631.11
327.534		502.028
1197.14		357.927
702.982		487.367
1682.72		739.812
701.552		960.432
498.452		321.098
256.377		572.111
1254.35		1198.22
1288.68		439.811
806.32		2596.31
2963.54		1604.42
1307.27		2403.58
441.241		582.481
856.379		1413.83
348.273		1296.91
3433.03		707.988
1093.09		445.532
858.882		466.628
569.966		623.959
1172.83		702.267
422.647		331.825
446.605		725.151
1571.52		2406.44
1100.96		367.939
562.457		257.45
437.308		732.303
889.633		685.461
1014.43		601.432
914.306		510.967
1101.67		556.021
1344.1		470.204
641.122		960.075
376.878		532.421
1540.41		875.331
676.522		1146.37
913.233		365.079
1925.87		462.338
1816.1		1285.82
1045.18		773.066
1703.1		1787.13
849.228		785.581
1224.68		863.888
1197.5		439.096
662.934		1333.38
756.975		464.483
357.927		431.229
1614.07		783.435
330.752		418.357
548.154		675.092
740.884		404.411
1394.16		1684.51
353.279		639.335
1026.22		1211.8
692.97		1580.1
1128.13		1233.62
1219.31		551.73
504.531		962.22
990.468		1210.02
1175.69		1030.52
688.679		586.772
1381.65		1116.33
698.334		438.023
748.751		368.654
1919.43		517.046
302.862		817.762
1163.17		3093.69
251.371		416.926
702.624		1434.57
1226.82		1587.61
1739.93		566.033
531.706		712.994
1509.66		1035.52
550.657		704.055
1373.78		1615.86
1245.42		1308.35
562.1		355.067
1079.86		417.284
306.795		769.848
287.844		919.312
3431.6		471.634
861.743		552.445
918.954		1592.26
250.656		1504.65
1546.13		952.566
1165.32		479.859
546.724		843.507
1305.13		1615.14
1426.35		513.828
520.264		971.159
612.517		317.879
1494.64		379.739
570.681		628.965
563.887		909.3
637.547		1187.49
368.297		420.144
1047.32		1649.83
583.911		832.78
607.153		533.494
573.899		926.105
1758.17		1058.76
1070.21		1279.38
1117.05		1348.04
882.124		1664.84
719.43		345.412
1326.94		668.655
1068.78		682.601
948.99		868.179
1395.95		866.749
2263.77		1447.44
1297.26		4169.26
724.079		518.476
935.402		939.693
269.25		770.205
1702.39		440.526
1280.46		515.615
1182.48		1257.93
1100.96		720.503
639.692		1091.3
448.035		412.635
868.537		1513.23
768.06		805.604
1519.31		322.17
1341.6		447.677
1135.28		935.76
541.36		887.845
1548.99		2121.1
1113.11		1077
1231.47		450.538
1522.53		365.079
922.53		871.397
1716.69		833.495
1314.43		284.268
1076.64		861.743
1680.58		714.782
1202.86		698.691
750.896		3210.98
1656.98		1348.4
1857.93		922.53
2666.75		937.548
1014.78		426.938
589.632		1693.09
1293.33		402.623
1704.18		1348.75
1551.85		474.495
1261.51		781.29
808.107		1078.43
589.99		970.802
722.291		447.32
1018.36		2064.61
1801.08		1724.92
1873.67		1802.15
503.101		571.039
355.424		1321.58
696.188		528.13
763.054		2325.28
1764.25		367.224
630.395		862.816
571.039		823.125
728.369		2731.83
665.437		1389.87
579.62		1260.43
299.286		413.708
740.527		650.419
997.977		1192.49
609.656		304.292
622.529		581.051
619.311		473.422
1939.46		650.062
1058.41		585.699
970.087		452.683
1235.05		1026.94
1091.3		2923.85
1400.96		1477.12
2166.16		601.79
832.422		787.011
1718.48		394.399
1538.26		361.861
1033.38		1067.7
1066.27		1365.56
1354.12		446.962
459.835		1811.09
991.898		2090.35
1205.37		672.589
1034.45		294.28
794.162		465.198
1259.36		537.427
574.257		723.006
1404.18		936.475
961.505		313.231
872.47		1103.1
1028.37		1355.9
804.174		1082.72
1525.03		348.273
1331.95		1775.33
791.302		567.463
675.449		456.259
518.476		1622.65
1866.51		1395.59
495.949		1163.53
1825.75		337.188
3689.76		614.662
962.578		526.7
1473.54		345.055
1175.33		2697.51
563.172		720.86
1049.11		719.788
2755.07		1638.74
686.891		488.798
3428.74		2461.15
1272.59		756.617
830.634		769.49
2298.46		1759.24
540.288		474.495
1476.76		389.751
1301.91		450.895
1360.91		415.138
1348.04		726.939
2127.9		993.329
386.175		546.009
1990.95		1549.71
886.773		1729.92
355.782		842.077
1154.95		1425.63
1220.74		989.753
616.45		1080.93
552.445		529.918
559.597		1527.54
589.99		933.614
264.959		1133.5
946.487		316.092
635.401		306.08
767.702		1764.96
784.15		1295.47
1282.6		2190.83
528.13		1658.77
798.096		975.808
1222.17		564.96
2124.68		933.614
1151.02		494.161
525.985		515.258
1457.81		396.545
1633.74		3910.38
1138.86		438.023
457.689		279.262
948.99		828.489
727.654		874.973
568.178		610.371
938.978		3484.52
971.517		2167.94
827.416		868.894
859.24		1949.11
825.271		437.308
1104.89		740.527
461.622		2354.6
1052.69		301.789
636.474		1085.22
560.312		303.934
773.066		469.489
568.178		1174.26
765.914		257.093
411.92		612.874
996.189		606.081
1131.71		1006.56
630.395		708.703
1294.76		528.488
892.494		505.961
961.505		1995.24
1151.73		551.015
407.272		483.792
1052.33		488.44
1295.12		474.137
849.586		1351.61
1042.32		1760.32
618.238		564.96
536.712		888.918
584.626		1138.86
517.046		617.523
1190.35		1970.92
1021.22		676.522
875.688		1393.81
665.437		1976.65
1808.59		391.181
1481.41		535.639
394.042		950.063
1008.7		1118.12
2306.68		724.794
1869.37		799.526
429.084		808.823
3982.61		742.315
1071.64		1435.64
2550.54		423.005
1598.69		710.491
1954.48		1296.19
1264.01		395.83
2084.27		1994.52
374.018		1269.01
575.33		519.906
2570.93		1149.59
1369.13		2136.12
646.844		323.958
694.4		547.082
1077.36		1088.8
857.452		962.935
2103.94		715.497
1860.44		1097.74
3405.49		1135.28
337.903		350.418
842.434		581.408
530.633		2654.24
2391.43		266.747
955.784		1446.37
276.044		366.509
568.893		2983.92
5167.95		1558.29
1286.89		632.541
630.395		261.741
557.451		575.687
705.485		681.885
1196.79		372.588
2241.25		365.794
1255.07		1476.05
318.595		486.652
3621.47		1496.43
838.501		561.742
3066.16		1166.03
498.81		708.703
322.528		2117.89
3304.3		294.28
2123.96		774.496
429.084		748.036
1149.94		823.841
619.668		774.138
733.018		1708.83
539.215		503.458
1855.43		987.965
4512.53		548.512
812.041		1412.76
8933.16		524.555
3583.21		505.961
1605.85		1896.91
1011.92		1546.49
1976.29		722.648
3597.15		390.824
2923.85		903.221
1354.12		2017.05
2030.64		423.005
490.943		931.469
1207.16		696.188
2003.46		456.259
1066.27		420.144
546.724		1070.56
1612.28		782.72
1368.42		2406.09
2217.65		851.373
1834.69		397.975
3005.73		2505.85
725.866		1387.37
947.917		305.365
1042.67		1865.08
1572.23		954.711
996.904		1162.82
2617.77		478.786
801.671		1109.54
853.876		463.41
1985.58		1228.61
2039.93		880.337
3308.95		1335.88
523.124		518.834
12854.6		403.339
1186.77		632.541
327.176		912.16
1181.77		642.91
4532.55		666.152
1599.41		1152.45
2227.3		440.526
1158.53		418.357
1245.06		341.837
1306.56		618.596
350.061		661.504
948.99		1183.56
795.235		1701.67
6839.59		1020.5
374.733		281.407
1969.85		2536.24
1701.67		2736.84
3275.7		1105.25
5326.72		982.959
306.08		440.526
903.936		352.921
1938.39		3152.33
2370.69		1070.21
1214.66		672.231
542.076		1925.16
1474.62		510.609
2009.9		2320.27
1617.29		365.794
2497.62		601.432
1169.61		380.097
1813.24		383.672
2845.9		423.72
1001.55		1634.09
607.511		413.708
1425.99		1346.25
1209.3		1102.74
1652.69		574.257
1387.37		1516.1
1633.74		2571.28
2261.63		397.617
277.474		1005.84
2071.76		315.734
1108.11		327.534
2579.87		421.932
3167.71		1616.93
2412.88		2230.16
6371.89		750.181
853.519		314.304
2661.39		1698.1
5956.4		1316.93
852.804		970.802
3628.97		951.85
1366.99		1374.14
941.839		410.132
1825.04		1142.79
899.288		1084.15
2148.64		715.854
2031.35		689.752
543.506		807.035
1301.91		941.481
1730.28		1985.23
5650.67		813.113
4079.15		1559
493.089		1010.13
622.529		258.88
463.768		632.541
397.975		655.783
3052.21		1841.84
2528.38		651.492
1300.12		1461.39
1049.82		1328.01
1808.23		1520.39
3413.36		1648.4
1614.78		495.234
430.156		862.816
480.931		710.133
3569.26		1176.4
291.419		1437.79
619.668		350.061
364.006		1624.8
325.388		1257.93
417.284		1295.83
729.442		1014.43
2045.66		997.977
3959.73		1031.59
892.851
2692.5
389.036
1652.33
2085.7
1641.24
2543.04
528.488
3704.06
635.759
2888.09
1021.58
867.822
1638.74
434.805
495.234
788.084
2936
803.817
1940.17
2816.22
1742.44
1951.26
1423.84
3119.08
1318
7576.9
1247.2
1634.45
865.319
388.321
279.262
544.221
1494.28
2236.96
1491.78
3385.83
4495.72
392.969
5335.65
1882.96
1889.4
1634.09
1438.86
1601.55
2533.38
1661.98
1190.35
1561.15
1372.35
2611.69
1690.59
1556.86
1221.1
2281.65
7046.63
1449.59
1645.18
517.761
1773.9
1209.3
3419.8
859.597
8520.53
436.235
1349.83
2569.14
1179.26
1469.97
5504.43
2718.24
3082.25
999.407
3612.17
364.363
2263.77
2551.62
2569.5
270.323
1647.68
1893.33
1279.38
4382.37
1053.76
1186.42
844.222
455.901
1066.99
589.632
374.733
1020.15
1759.6
411.92
375.091
378.666
1669.14
292.85
1727.42
2208.71
1292.26
2903.82
402.981
1214.66
776.999
430.156
1403.1
1738.86
1276.17
2235.17
1087.37
982.244
2567.71
1805.01
2422.89
2137.91
2317.41
3808.12
526.343
401.193
2324.56
347.558
2571.28
1241.48
1372.71
994.044
3571.76
1276.17
494.876
7531.49
1493.57
469.847
1970.57
751.254
920.742
2507.28
1972
1289.75
1699.17
764.484
1549.35
3512.05
1832.54
1257.21
1382.01
1314.78
889.991
3777.01
765.557
1247.2
1276.17
1373.43
1143.15
2756.86
1320.15
262.814
811.683
1795.36
1068.42
1296.91
2299.17
1778.91
2144.35
525.627
1100.96
1927.66
1717.05
5059.97
1171.04
3127.66
1200.72
1183.2
3389.76
4574.75
1958.05
1479.98
371.515
5634.94
5868.08
3106.21
2390.35
10646.6
380.097
5387.86
1741.36
554.591
428.368
1983.08
276.759
609.656
607.511
557.451
2305.97
2481.89
576.76
692.612
1635.52
1029.44
1221.1
3300.37
1883.68
2040.29
1782.13
2351.02
428.726
994.401
2983.2
1185.34
2221.94
3073.67
1528.25
719.788
1145.65
1210.37
10185.7
2207.64
1244.7
2055.31
2553.41
2170.45
4418.49
1679.86
1950.18
399.048
2997.15
1373.78
765.914
525.985
600.717
384.387
2210.85
6095.13
552.088
2420.03
2707.52
2614.19
3992.98
692.255
12783.5
1245.77
2574.14
4176.41
697.261
2815.15
1119.19
1577.6
3030.05
1633.02
6955.8
1508.59
2812.64
1630.16
3362.59
3826.71
1200.36
2418.24
1250.78
622.529
1205.72
2904.18
3101.2
3046.14
4468.55
3848.52
19786.1
2668.9
898.215
1577.24
1587.97
5923.14
572.111
3378.32
303.934
3187.73
2155.79
712.279
1395.24
18740.9
318.952
2777.24
1529.68
1397.74
3554.24
324.316
3335.77
1199.65
6771.65
1498.93
3274.98
2948.16
4411.69
2296.67
697.976
1460.31
2775.1
687.606
2402.87
5990.72
1779.98
2244.46
4734.94
2877.36
2993.22
2455.43
4465.33
1196.79
2632.07
787.726
6354.01
3129.09
3211.69
2827.66
1870.8
1453.52
3272.84
1102.03
2151.14
2445.78
279.619
670.086
2751.5
1708.83
2291.66
1905.49
813.113
3540.3
2860.2
2168.66
2826.59
4601.21
457.689
1447.44
7296.21
708.703
1858.29
2952.81
1822.53
620.383
1985.94
1915.86
1925.87
4045.54
2842.68
2737.2
1462.46
1612.28
1327.3
432.659
518.476
906.797
3331.12
2651.02
413.708
2961.39
1240.41
3423.01
4249
2365.32
645.056
2898.82
2057.81
1576.52
1736
2732.19
2194.41
3382.97
1225.39
3425.16
356.855
2095
1949.83
4493.58
1935.88
800.956
3335.05
1935.17
3763.78
2829.09
369.727
3026.83
401.193
542.433
2435.05
957.214
3632.19
2063.53
547.797
618.238
1905.85
7825.77
4073.08
3552.45
804.532
3880.7
3164.13
840.646
640.05
1488.2
1758.89
8917.07
7611.59
2133.98
7306.58
1874.38
542.791
2138.98
2329.92
1577.6
5427.91
2321.7
3541.01
6582.5
6871.77
2177.24
6961.17
2126.82
468.416
5880.59
1824.32
1459.24
4185
2050.66
5773.32
3066.88
446.605
2638.15
2600.6
588.56
8304.2
943.984
1077.71
2326.71
2731.47
1693.45
2513
2660.68
2909.19
2298.46
2853.41
263.886
1126.34
2715.38
1839.34
12333.7
3596.08
3089.04
1847.56
5595.97
2017.41
2449.35
529.918
696.188
513.47
980.814
367.224
2287.37
2585.59
336.115
564.603
2467.95
372.945
2498.7
1285.82
2341.01
1879.03
2574.5
3505.61
917.524
989.038
543.863
1183.91
390.109
526.343
1500.36
2439.7
2662.82
4832.55
1737.07
1271.16
436.95
2199.77
2535.53
946.487
612.874
3104.42
791.302
1942.32
5519.45
2025.27
1811.45
6133.39
331.825
1712.4
2473.31
1892.97
1708.83
2863.42
2333.5
2890.95
3347.92
2662.82
2178.31
1411.69
508.464
4736.73
472.35
2330.64
466.986
2450.78
2253.4
383.672
3660.8
646.486
991.183
2182.25
1358.05
2583.08
1636.24
700.837
293.922
1307.99
1735.64
2688.92
354.709
1018
2343.87
2430.04
1313.35
1411.33
2572
3483.44
674.734
5217.66
8128.27
2059.6
6944.72
470.919
319.31
4060.92
8587.04
307.51
5173.68
4904.07
3786.66
1679.5
5897.4
3822.42
361.145
6031.84
1705.25
430.514
2527.3
1716.69
3162.35
4280.82
2088.21
2693.21
1839.34
513.47
1808.59
2272.36
2939.58
5185.12
3315.03
1036.24
6496.33
1803.94
3428.02
3190.95
3718.37
4459.25
2491.55
2090.71
299.286
393.684
2490.47
4654.13
763.769
2225.51
551.015
1595.12
1216.81
2104.66
2131.83
1879.74
2551.62
2071.4
3335.05
900.36
1772.83
2086.78
1631.95
[truncated: 467 more rows]
