# Supplementary material for: RAL GTPases mediate EGFR-driven intestinal stem cell proliferation and tumourigenesis
Source: eLife journal article supplement (doi:10.7554/elife.63807), 2021-06-07
Supplement: supp [file elife_poa_e63807_Figure_4_figure_supplement_1.pdf › elife_poa_e63807_Figure_4_figure_supplement_1.pdf]

A

DAPI ISC/EB EGFR

DAPI ISC/EB EGFR Cell outline

EGFR

Nucleus Cytoplasm Membrane

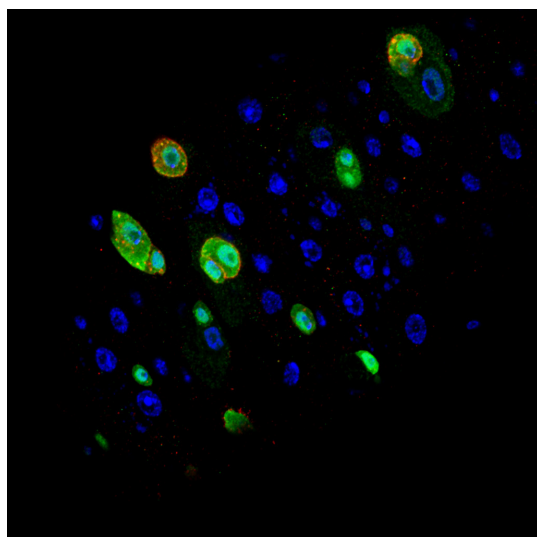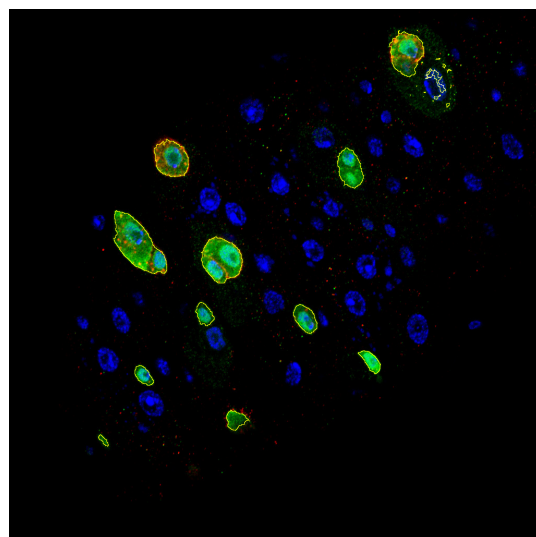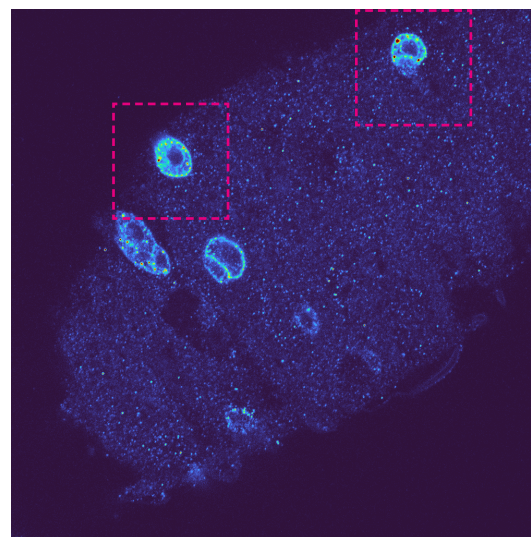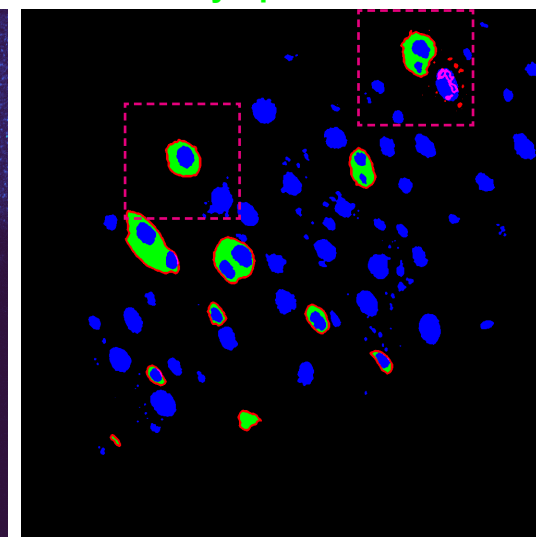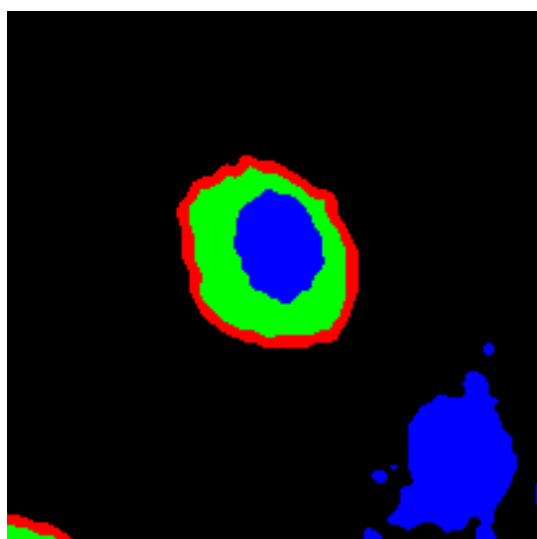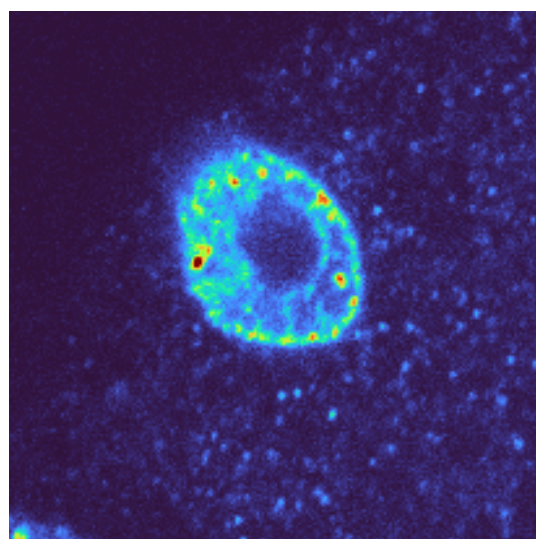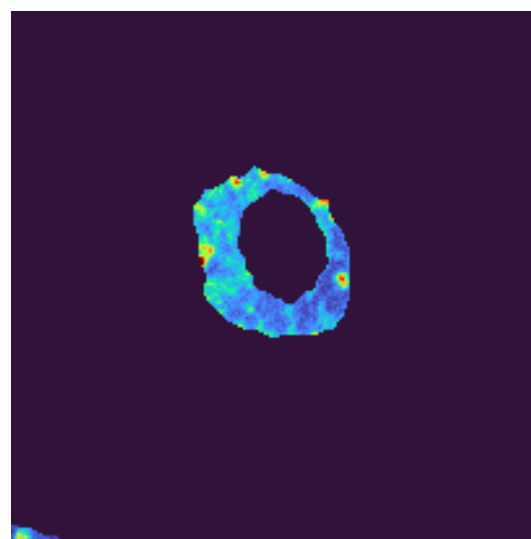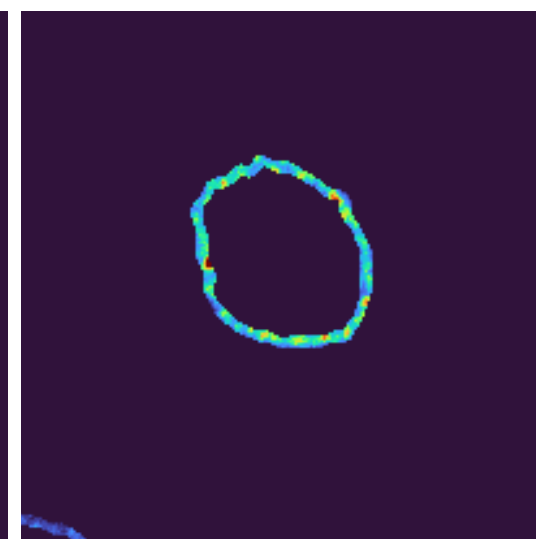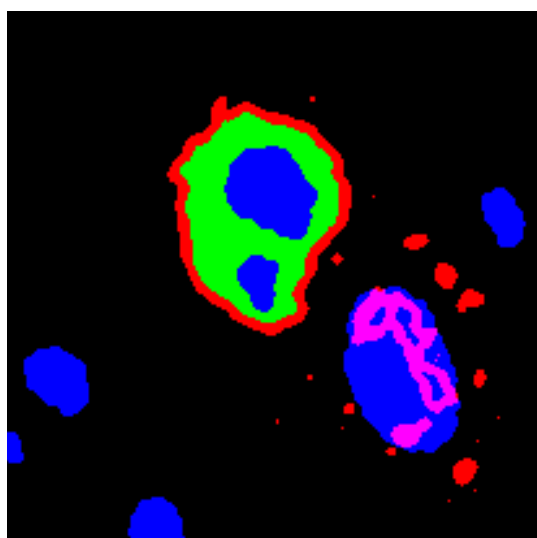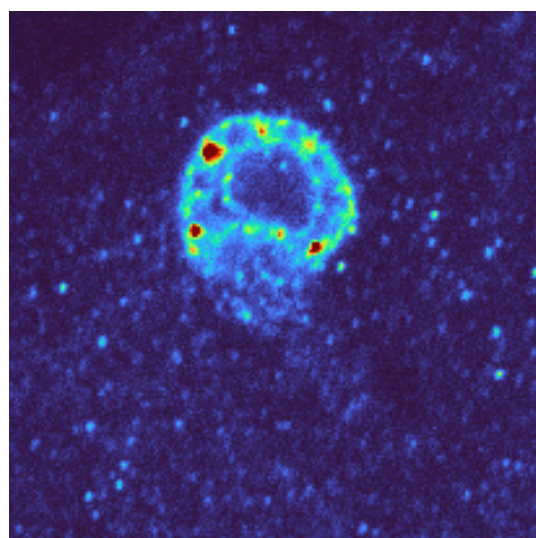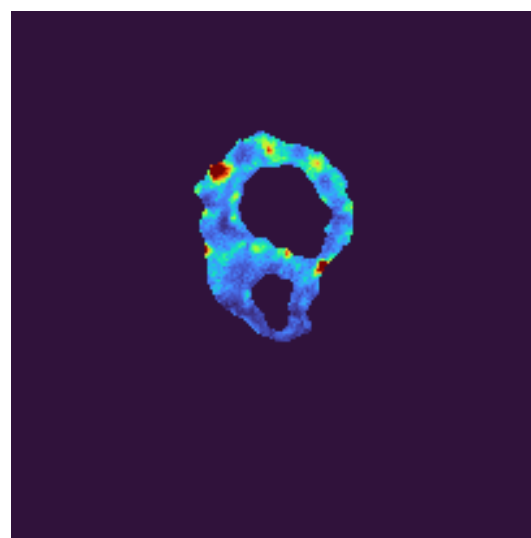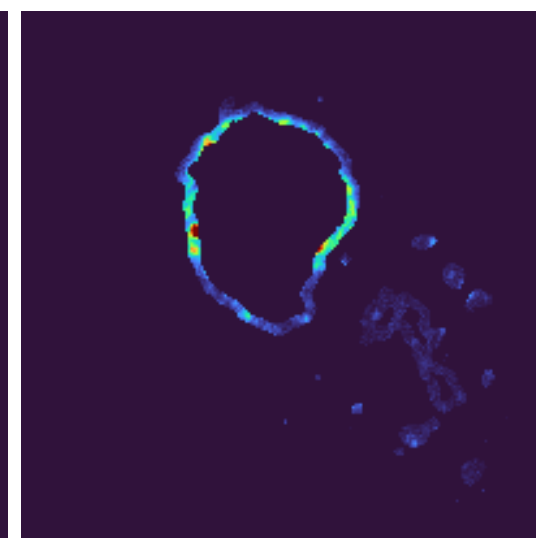

B

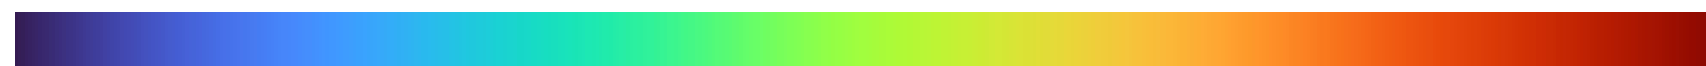

Turbo Colourmap

0

65,535 Pixel intensity

Fig 4-Supplement 1
