# Supplementary material for: RAL GTPases mediate EGFR-driven intestinal stem cell proliferation and tumourigenesis
Source: eLife. 2021 Jun 7;10:e63807. doi: 10.7554/eLife.63807 (PMC8216719; doi:10.7554/eLife.63807)
Supplement: Supplementary file 1. — Table containing a list of all Drosophila genotypes used in the paper. [file elife-63807-supp1.xlsx]

## Sheet: Full list of genotypes
Figure 1A, B	w1118 / +; en-gal4, UAS-RFP / +
	en-gal4, UAS-RFP / P{KK108857}VIE-260B
	en-gal4, UAS-RFP / P{KK100051}VIE-260B
	w1118 / +; en-gal4, UAS-RFP / P{KK100051}VIE-260B; P{GD5007}v13351 / +
	en-gal4, UAS-RFP / P{KK108989}VIE-260B
Figure 1C-H	UAS-Dcr2 / w1118; esg-Gal4NP5130, UAS-GFP, UAS-GFPnLacZ / +; tub-Gal80ts / +
	UAS-Dcr2 / +; esg-Gal4NP5130, UAS-GFP, UAS-GFPnLacZ / P{KK108989}VIE-260B; tub-Gal80ts / +
Figure 1K-N	y, w / w1118; esg-Gal4NP5130,UAS-GFP,UAS-GFPnLacZ/+; tub-Gal80ts/+
	y, w / +; esg-Gal4NP5130, UAS-GFP, UAS-GFPnLacZ /+; tub-Gal80ts / P{UAS-RalA}3
Figure 1-figure supplement 1A-D	UAS-Dcr2 / w1118; esg-Gal4NP5130, UAS-GFP, UAS-GFPnLacZ / +; tub-Gal80ts / +
	UAS-Dcr2 / y, w; esg-Gal4NP5130, UAS-GFP, UAS-GFPnLacZ / +; tub-Gal80ts / P{y+t7.7 v+t1.8=TRiP.JF03259}attP2
Figure 1-figure supplement 1F, G	y, w / w1118; esg-Gal4NP5130,UAS-GFP,UAS-GFPnLacZ/+; tub-Gal80ts/+
	y, w / +; esg-Gal4NP5130, UAS-GFP, UAS-GFPnLacZ /+; tub-Gal80ts / P{UAS-RalA}3
Figure 1-figure supplement 1H	y, w / w1118; esg-Gal4NP5130,UAS-GFP,UAS-GFPnLacZ/+; tub-Gal80ts/+
	y, w / +; esg-Gal4NP5130, UAS-GFP, UAS-GFPnLacZ /+; tub-Gal80ts / P{UAS-RalA}3
Figure 1-figure supplement 1I, J	y, w / w1118; esg-Gal4NP5130,UAS-GFP,UAS-GFPnLacZ/+; tub-Gal80ts/+
Figure 2A-F	UAS-Dcr2 / w1118; esg-Gal4NP5130, UAS-GFP, UAS-GFPnLacZ / +; tub-Gal80ts / +
	UAS-Dcr2 / y,v; esg-Gal4NP5130, UAS-GFP, UAS-GFPnLacZ / P{y[+t7.7] v[+t1.8]=TRiP.HMJ02116}attP40; tub-Gal80ts / +
	UAS-Dcr2 / w1118; esg-Gal4NP5130, UAS-GFP, UAS-GFPnLacZ / +; tub-Gal80ts / P{GD11683}v40596/TM3
	UAS-Dcr2 / y,v; esg-Gal4NP5130, UAS-GFP, UAS-GFPnLacZ / +; tub-Gal80ts / P{y[+t7.7] v[+t1.8]=TRiP.HM05149}attP2
Figure 3A-D	UAS-Dcr2 / w1118; esg-Gal4NP5130, UAS-GFP, UAS-GFPnLacZ / +; tub-Gal80ts / +
	UAS-Dcr2 / +; esg-Gal4NP5130, UAS-GFP, UAS-GFPnLacZ / P{KK108989}VIE-260B; tub-Gal80ts / +
	UAS-Dcr2 / w1118; esg-Gal4NP5130, UAS-GFP, UAS-GFPnLacZ / +; tub-Gal80ts / P{w[+mc]=UAS-Egfr.B}32-26-1
	UAS-Dcr2 / +; esg-Gal4NP5130, UAS-GFP, UAS-GFPnLacZ / P{KK108989}VIE-260B; tub-Gal80ts / P{w[+mc]=UAS-Egfr.B}32-26-1
	UAS-Dcr2 / w1118; esg-Gal4NP5130, UAS-GFP, UAS-GFPnLacZ / +; tub-Gal80ts / P{w[+mC]=UAS-Ras85D.V12}TL1
	UAS-Dcr2 / +; esg-Gal4NP5130, UAS-GFP, UAS-GFPnLacZ / P{KK108989}VIE-260B; tub-Gal80ts / P{w[+mC]=UAS-Ras85D.V12}TL1
Figure 3E-H	UAS-Dcr2 / w1118; esg-Gal4NP5130, UAS-GFP, UAS-GFPnLacZ / +; tub-Gal80ts / +
	UAS-Dcr2 / +; esg-Gal4NP5130, UAS-GFP, UAS-GFPnLacZ / P{KK108989}VIE-260B; tub-Gal80ts / +
	UAS-Dcr2 / w1118; esg-Gal4NP5130, UAS-GFP, UAS-GFPnLacZ / +; tub-Gal80ts / P{w[+mC]=UAS-Egfr.lambdatop}3
	UAS-Dcr2 / +; esg-Gal4NP5130, UAS-GFP, UAS-GFPnLacZ / P{KK108989}VIE-260B; tub-Gal80ts / P{w[+mC]=UAS-Egfr.lambdatop}3
	UAS-Dcr2 / w1118; esg-Gal4NP5130, UAS-GFP, UAS-GFPnLacZ / +; tub-Gal80ts / P{w[+mC]=Egfr.2.A887T.UAS}8-2
	UAS-Dcr2 / +; esg-Gal4NP5130, UAS-GFP, UAS-GFPnLacZ / P{KK108989}VIE-260B; tub-Gal80ts / P{w[+mC]=Egfr.2.A887T.UAS}8-2
Figure 3-figure supplement 1A, B	w1118 / +; en-gal4, UAS-RFP / +
	en-gal4, UAS-RFP / +; P{w[+mc]=UAS-Egfr.B}32-26-1 / +
	en-gal4, UAS-RFP / P{KK108989}VIE-260B; P{w[+mc]=UAS-Egfr.B}32-26-1 / +
Figure 3-figure supplement 1C, D	UAS-Dcr2 / w1118; esg-Gal4NP5130, UAS-GFP, UAS-GFPnLacZ / P{w[+mC]=UAS-Ras85D.V12}2; tub-Gal80ts / +
	UAS-Dcr2 / y, w; esg-Gal4NP5130, UAS-GFP, UAS-GFPnLacZ / P{w[+mC]=UAS-Ras85D.V12}2; tub-Gal80ts / P{y+t7.7 v+t1.8=TRiP.JF03259}attP2
Figure 3-figure supplement 1E, F	UAS-Dcr2 / w1118; esg-Gal4NP5130, UAS-GFP, UAS-GFPnLacZ / +; tub-Gal80ts / P{w[+mc]=UAS-Egfr.B}32-26-1
	UAS-Dcr2 / +; esg-Gal4NP5130, UAS-GFP, UAS-GFPnLacZ / P{KK108989}VIE-260B; tub-Gal80ts / P{w[+mc]=UAS-Egfr.B}32-26-1
Figure 4A,B	UAS-Dcr2 / w1118; esg-Gal4NP5130, UAS-GFP, UAS-GFPnLacZ / +; tub-Gal80ts / P{w[+mc]=UAS-Egfr.B}32-26-1
	UAS-Dcr2 / +; esg-Gal4NP5130, UAS-GFP, UAS-GFPnLacZ / P{KK108989}VIE-260B; tub-Gal80ts / P{w[+mc]=UAS-Egfr.B}32-26-1
Figure 4C,D	UAS-Dcr2 / w1118; esg-Gal4NP5130, UAS-GFP, UAS-GFPnLacZ / +; tub-Gal80ts / P{w[+mC]=Egfr.2.A887T.UAS}8-2
	UAS-Dcr2 / +; esg-Gal4NP5130, UAS-GFP, UAS-GFPnLacZ / P{KK108989}VIE-260B; tub-Gal80ts / P{w[+mC]=Egfr.2.A887T.UAS}8-2
Figure 4E,F	y, w / w1118; esg-Gal4NP5130,UAS-GFP,UAS-GFPnLacZ/+; tub-Gal80ts/+
	y, w / +; esg-Gal4NP5130, UAS-GFP, UAS-GFPnLacZ /+; tub-Gal80ts / P{UAS-RalA}3
Figure 4-figure supplement 1	UAS-Dcr2 / +; esg-Gal4NP5130, UAS-GFP, UAS-GFPnLacZ / P{KK108989}VIE-260B; tub-Gal80ts / P{w[+mC]=Egfr.2.A887T.UAS}8-2
Figure 4-figure supplement 2	UAS-Dcr2 / w1118; esg-Gal4NP5130, UAS-GFP, UAS-GFPnLacZ / +; tub-Gal80ts / P{w[+mc]=UAS-Egfr.B}32-26-1
	UAS-Dcr2 / w1118; esg-Gal4NP5130, UAS-GFP, UAS-GFPnLacZ / P{KK108029}VIE-260B; tub-Gal80ts / P{w[+mc]=UAS-Egfr.B}32-26-1
Figure 5A-H	UAS-Dcr2 / w1118; esg-Gal4NP5130, UAS-GFP, UAS-GFPnLacZ / +; tub-Gal80ts / +
	UAS-Dcr2 / y, w; esg-Gal4NP5130, UAS-GFP, UAS-GFPnLacZ / +; tub-Gal80ts / P{y+t7.7 v+t1.8=TRiP.JF03259}attP2
	UAS-Dcr2 / w1118; esg-Gal4NP5130, UAS-GFP, UAS-GFPnLacZ / P{w[+mC]=UAS-Src64B.C}2; tub-Gal80ts / +
	UAS-Dcr2 / y, w; esg-Gal4NP5130, UAS-GFP, UAS-GFPnLacZ / P{w[+mC]=UAS-Src64B.C}2; tub-Gal80ts / P{y+t7.7 v+t1.8=TRiP.JF03259}attP2
	w1118; esg-Gal4NP5130, UAS-GFP, UAS-GFPnLacZ, tub-Gal80ts / P{w[+mC]=UAS-Src64B.C}2; P{y+t7.7 v+t1.8=TRiP.JF03259}attP2 / P{w[+mc]=UAS-Egfr.B}32-26-1
