# Supplementary figures and images for: RAL GTPases mediate EGFR-driven intestinal stem cell proliferation and tumourigenesis
Source: eLife journal article supplement (doi:10.7554/elife.63807), 2021-06-07

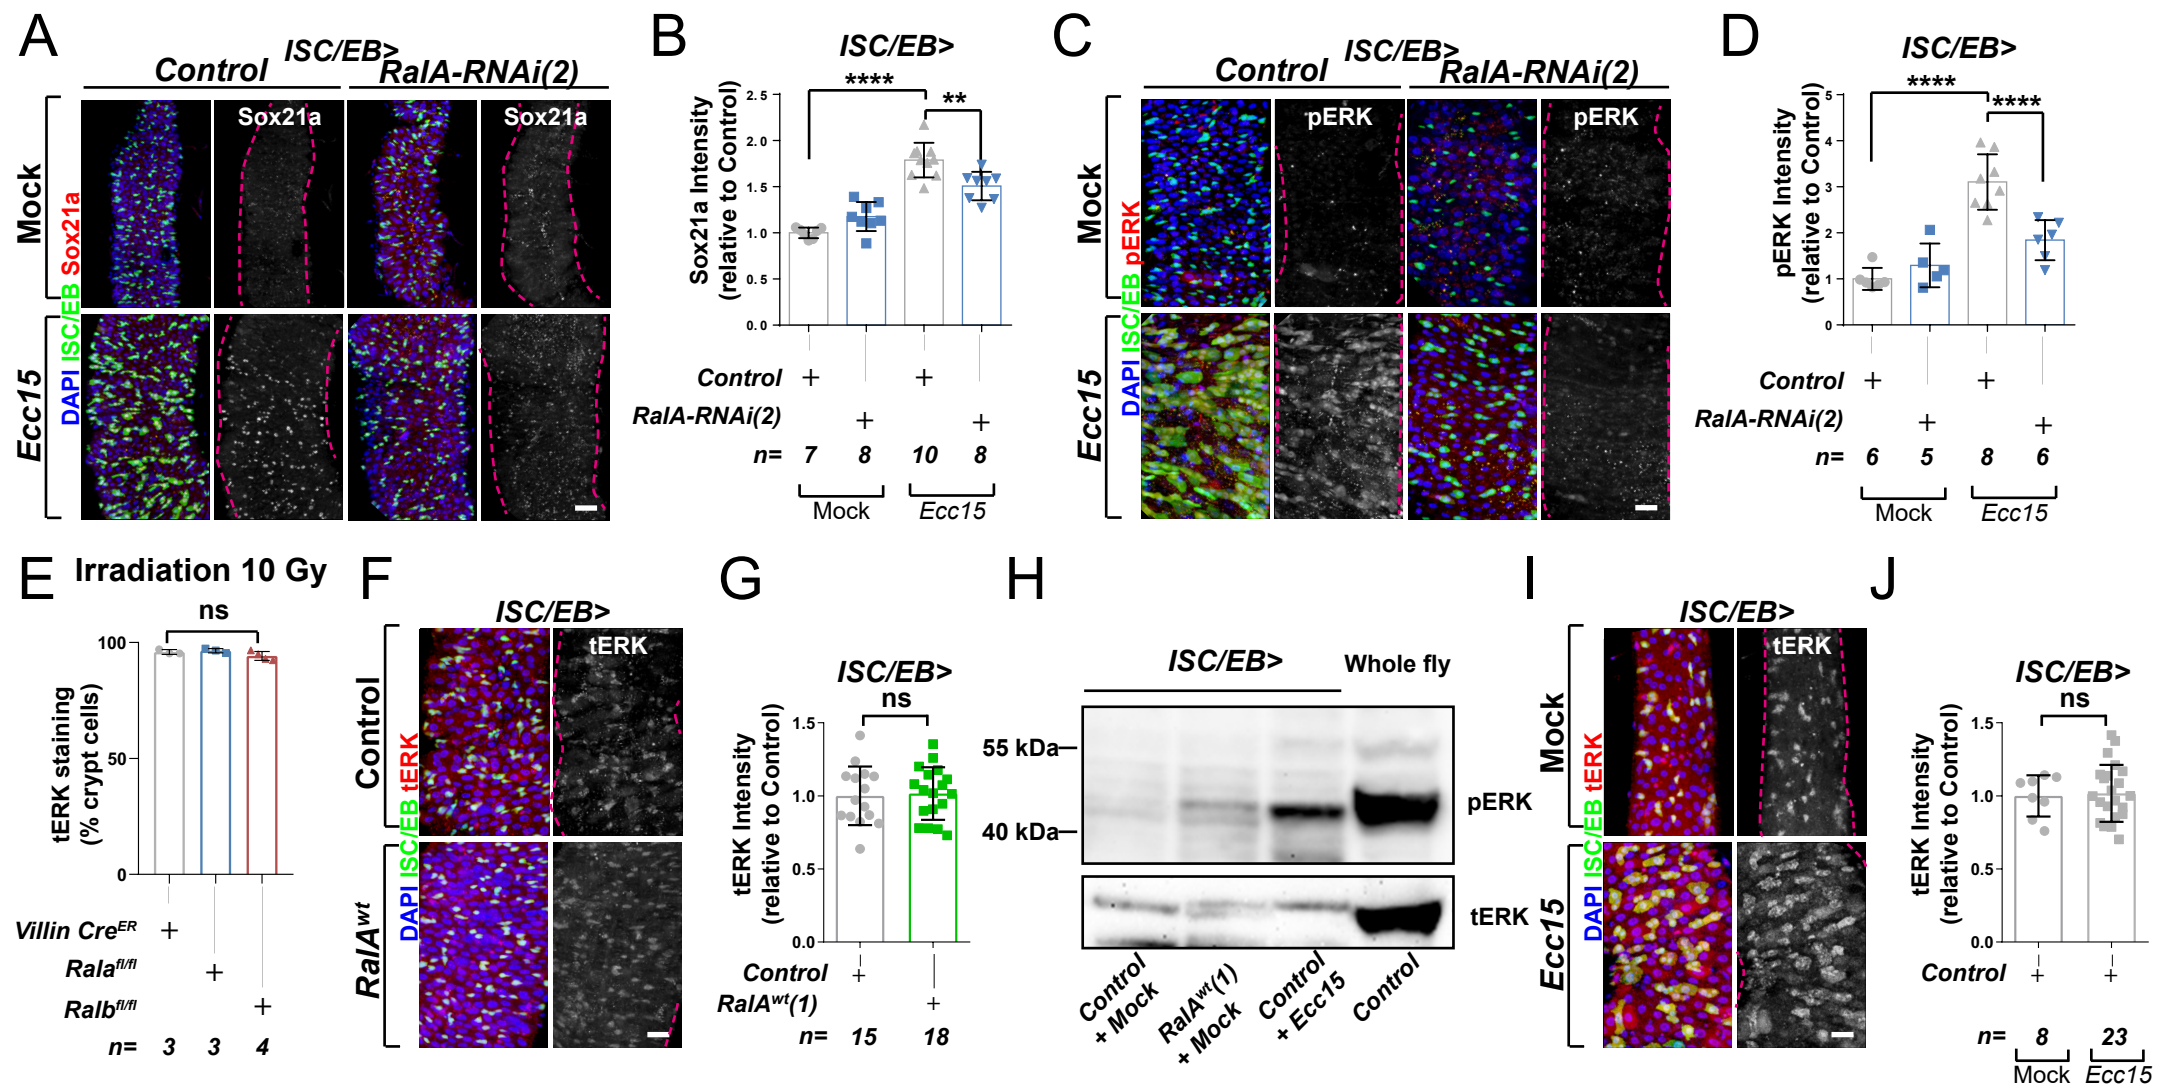

Fig 1-Supplement 1

Supplement: supp [file elife_poa_e63807_Figure_1_figure_supplement_1.pdf › elife_poa_e63807_Figure_1_figure_supplement_1.pdf]

A

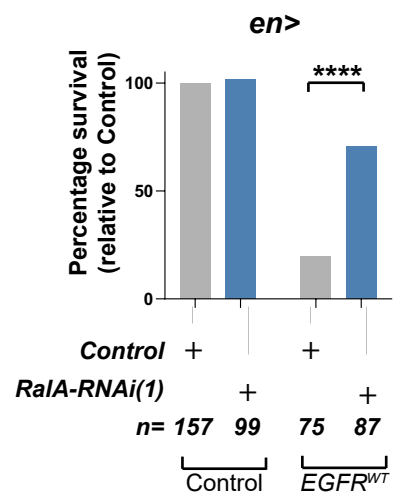

B

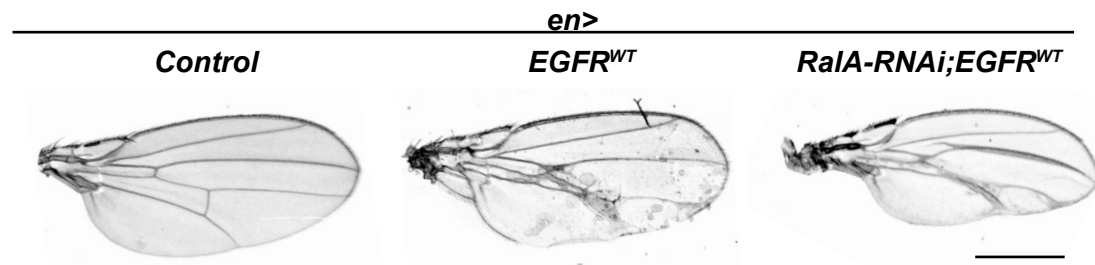

C

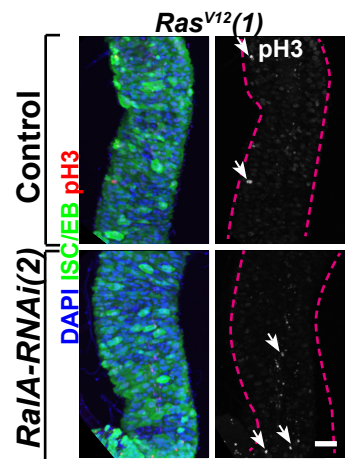

D

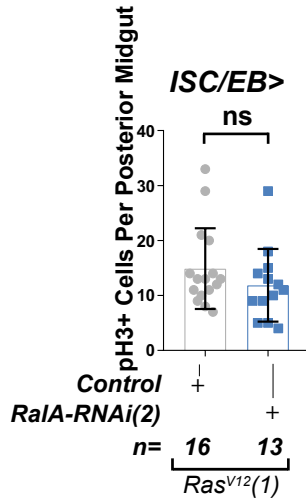

E

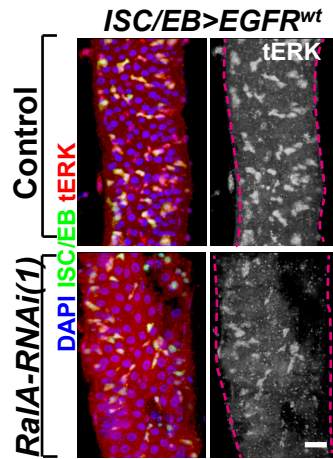

F

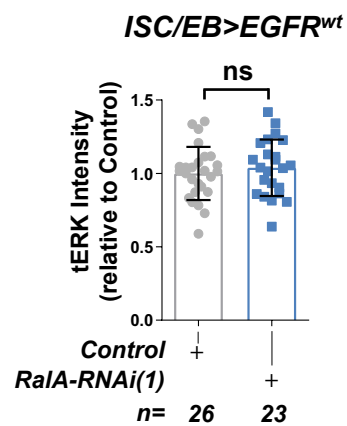

Fig 3-Supplement 1

Supplement: supp [file elife_poa_e63807_Figure_3_figure_supplement_1.pdf › elife_poa_e63807_Figure_3_figure_supplement_1.pdf]

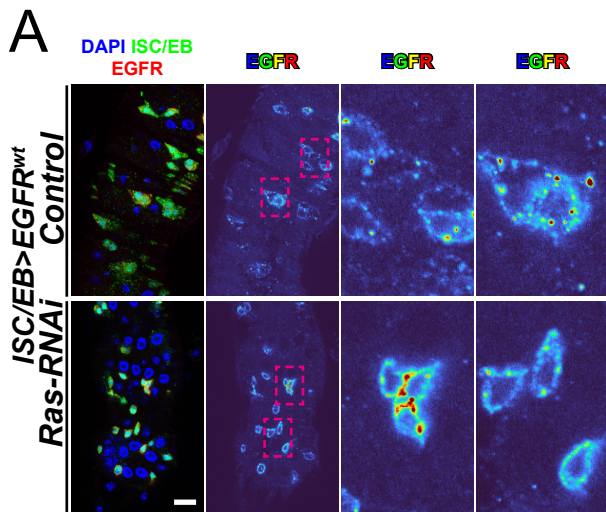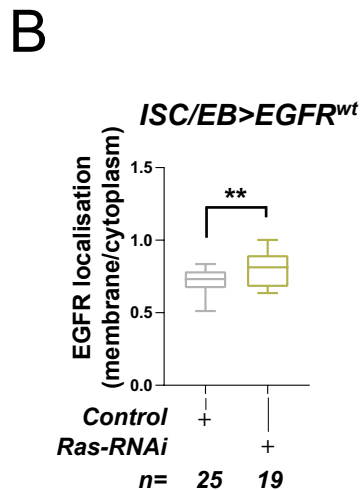

Fig 4-Supplement 2

Supplement: supp [file elife_poa_e63807_Figure_4_figure_supplement_2.pdf › elife_poa_e63807_Figure_4_figure_supplement_2.pdf]

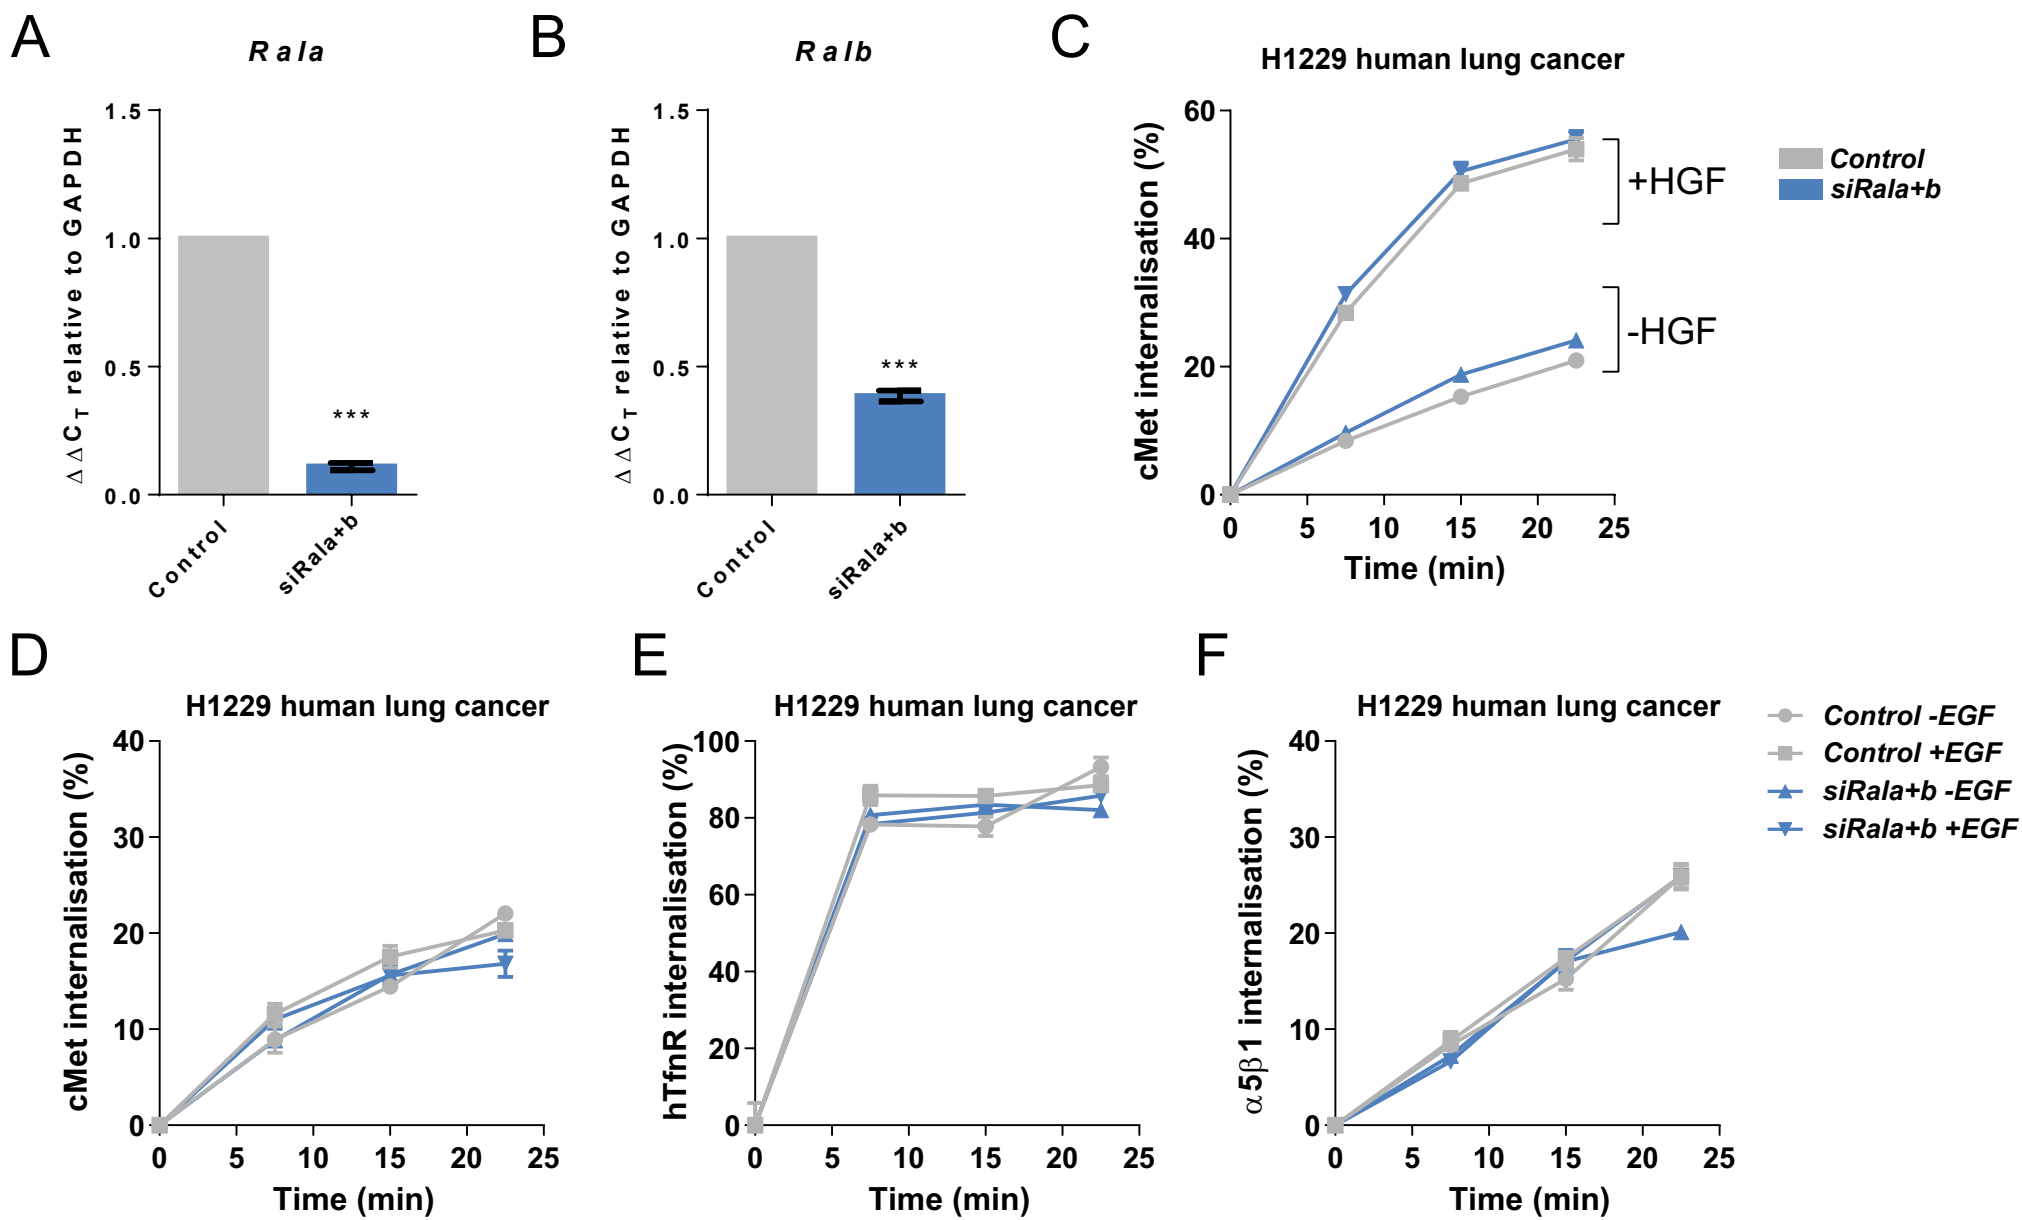

Fig 4-Supplement 3

Supplement: supp [file elife_poa_e63807_Figure_4_figure_supplement_3.pdf › elife_poa_e63807_Figure_4_figure_supplement_3.pdf]

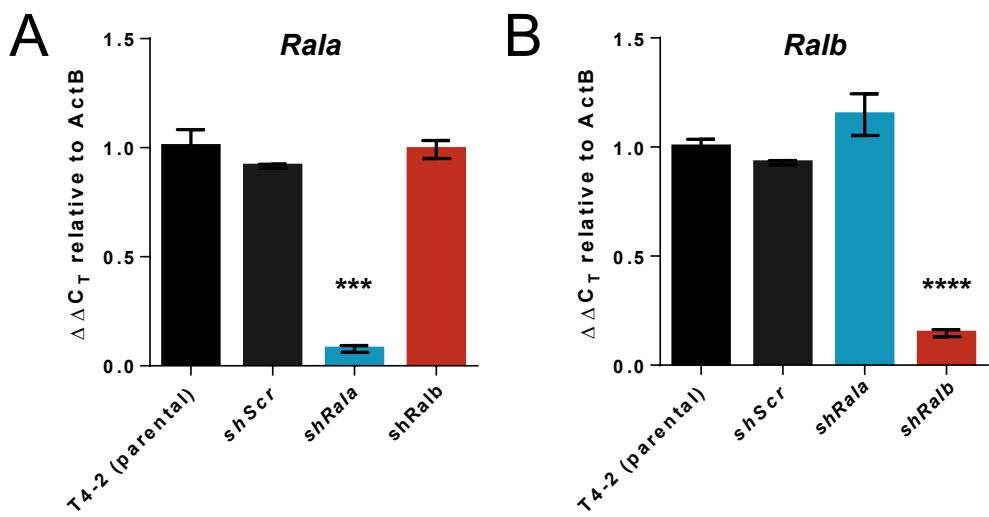

Fig 5-Supplement 1

Supplement: supp [file elife_poa_e63807_Figure_5_figure_supplement_1.pdf › elife_poa_e63807_Figure_5_figure_supplement_1.pdf]
